# Supplementary material for: Heterobimetallic rare earth metal–zinc catalysts for reactions of epoxides and CO2 under ambient conditions
Source: Royal Society of Chemistry journal article supplement (doi:10.1039/d0dt03772a), 2020-12-17
Supplement: d0dt03772a1.pdf [file d0dt03772a1.pdf]

## Supporting Information

### **Heterobimetallic Rare Earth Metal-Zinc Catalysts for Reactions of Epoxides and CO<sub>2</sub> under Ambient Conditions**

Kuan Yin,<sup>†,§</sup> Linyan Hua,<sup>†,§</sup> Liye Qu,<sup>†</sup> Quanyou Yao,<sup>†</sup> Yaorong Wang,<sup>†</sup> Dan

Yuan,<sup>\*,†</sup> Hongpeng You,<sup>‡</sup> Yingming Yao<sup>\*,†,‡</sup>

<sup>†</sup>Key Laboratory of Organic Synthesis of Jiangsu Province, College of Chemistry, Chemical Engineering and Materials Science, Dushu Lake Campus, Soochow University, Suzhou 215123, People's Republic of China

<sup>‡</sup>State Key Laboratory of Rare Earth Resource Utilization, Changchun Institute of Applied Chemistry, Chinese Academy of Sciences, Changchun 130022, People's Republic of China

<sup>§</sup>These authors contributed equally to this work.

\*Corresponding author. E-mail: yuandan@suda.edu.cn; yaoym@suda.edu.cn

---

## Contents

|                                                                       |            |
|-----------------------------------------------------------------------|------------|
| <b>1. Solid state structures of complexes 1-3 and 5-10.....</b>       | <b>S1</b>  |
| <b>2. NMR spectra of complexes.....</b>                               | <b>S6</b>  |
| <b>3. DOSY analysis of complexes 4 and 11.....</b>                    | <b>S12</b> |
| <b>4. Crystallographic radius analysis of complexes 4 and 11.....</b> | <b>S13</b> |
| <b>5. NMR spectra of cyclic carbonates.....</b>                       | <b>S15</b> |
| <b>6. Crystallographic data of complexes 1-11.....</b>                | <b>S24</b> |
| <b>7. Plausible mechanism .....</b>                                   | <b>S42</b> |

---

## 1. Crystallographic figures of complexes 1-3 and 5-10.

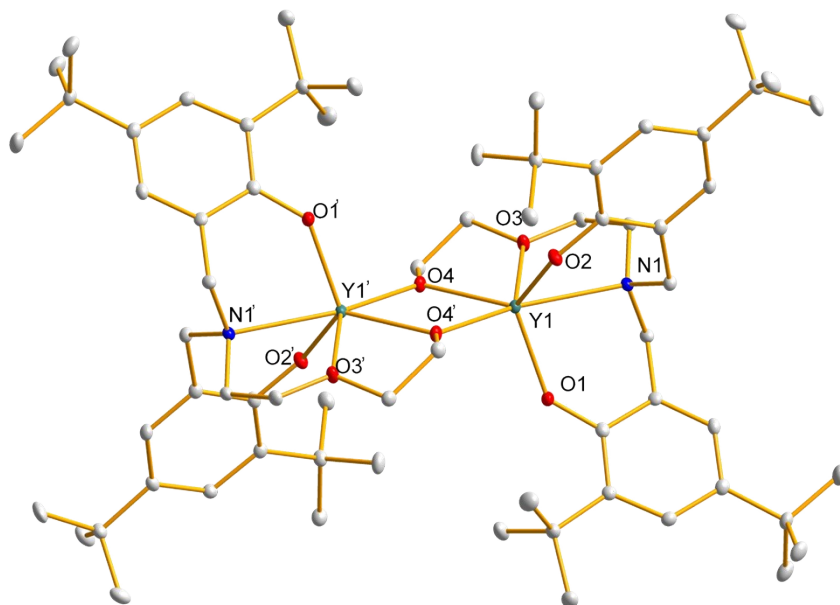

**Figure S1.** Solid state structure of complex 1·3tol. Thermal ellipsoids are drawn at the 30% probability level. Hydrogen atoms and solvent molecules are omitted for clarity.

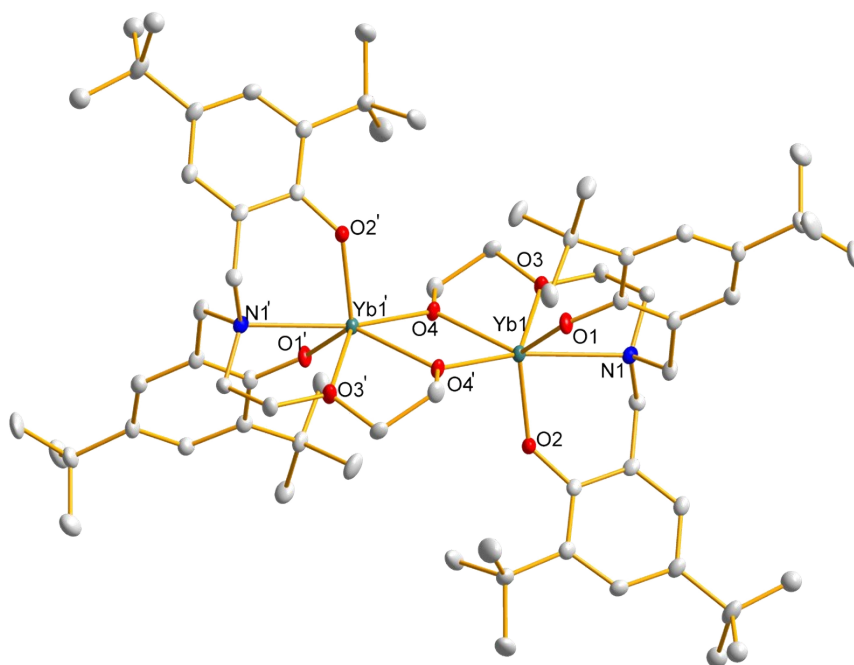

**Figure S2.** Solid state structure of complex 2·3tol. Thermal ellipsoids are drawn at the 30% probability level. Hydrogen atoms and solvent molecules are omitted for clarity.

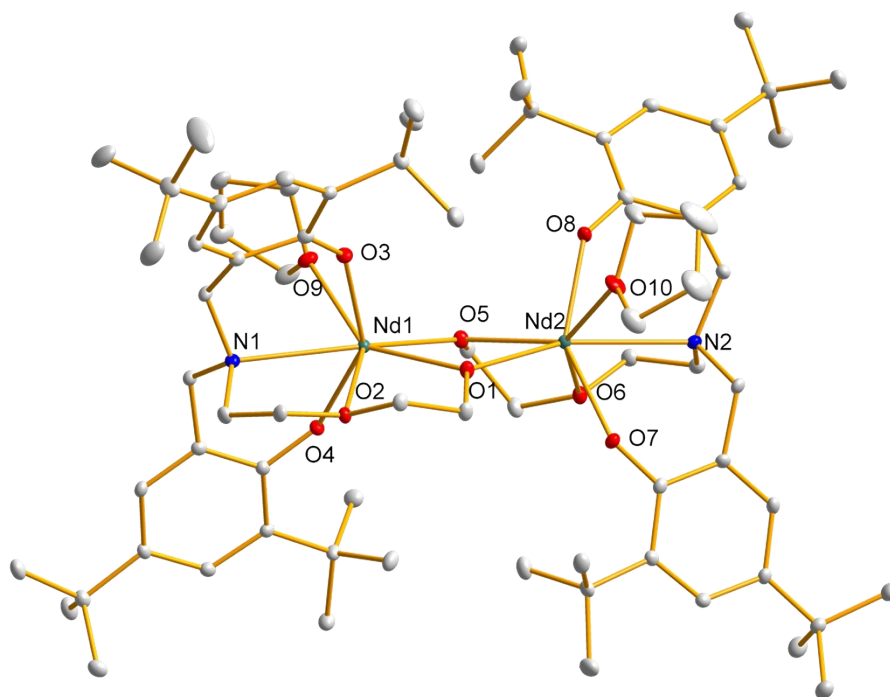

**Figure S3.** Solid state structure of complex **3**·tol·THF. Thermal ellipsoids are drawn at the 30% probability level. Hydrogen atoms and solvent molecules are omitted for clarity.

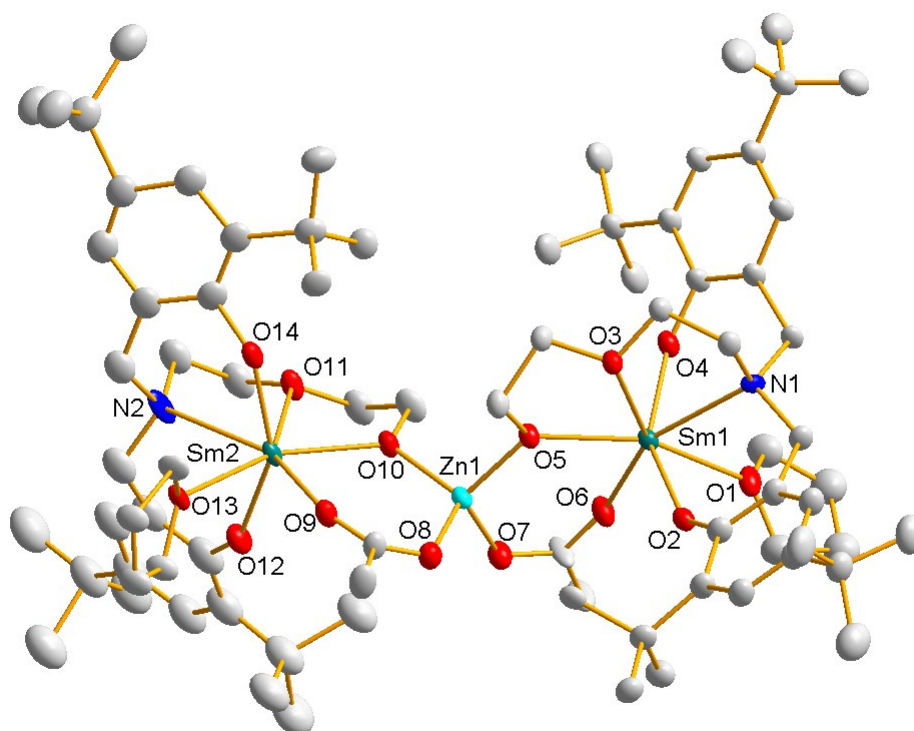

**Figure S4.** Solid state structure of complex **5**. Thermal ellipsoids are drawn at the 20% probability level. Hydrogen atoms and solvent molecules are omitted for clarity.

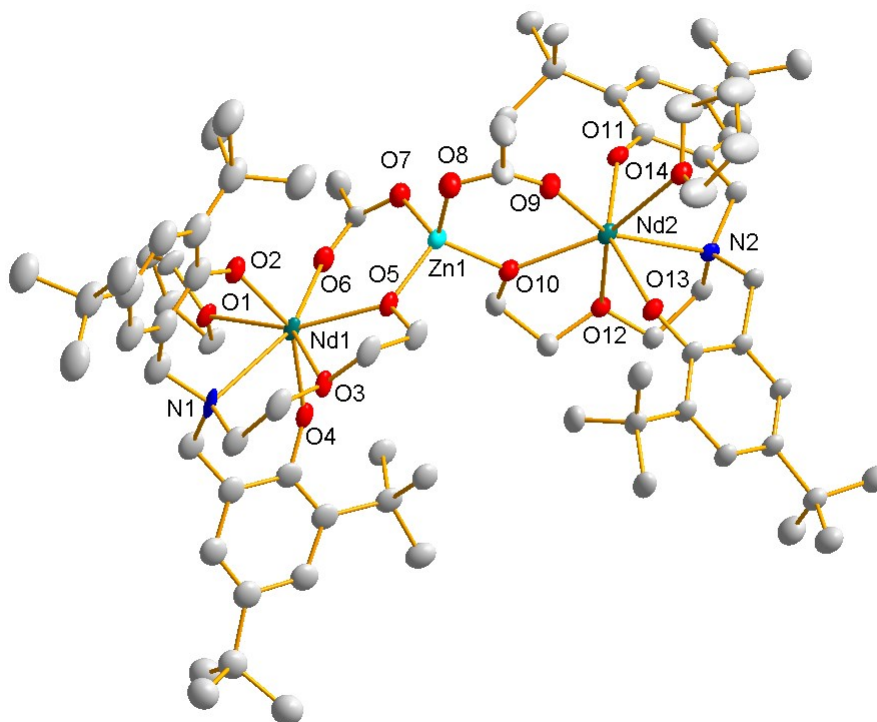

**Figure S5.** Solid state structure of complex **6**. Thermal ellipsoids are drawn at the 20% probability level. Hydrogen atoms and solvent molecules are omitted for clarity.

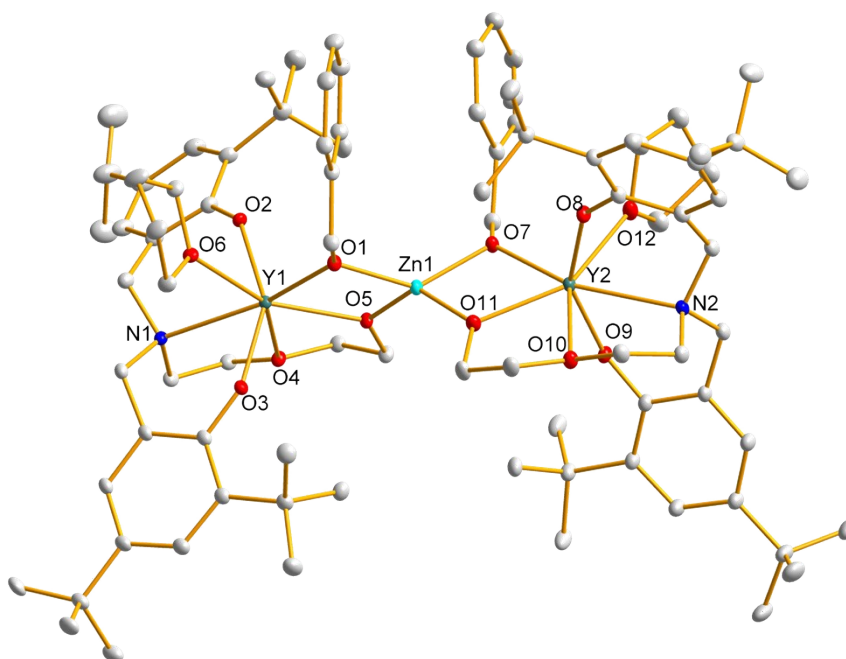

**Figure S6.** Solid state structure of complex **7·4THF**. Thermal ellipsoids are drawn at the 20% probability level. Hydrogen atoms and solvent molecules are omitted for clarity.

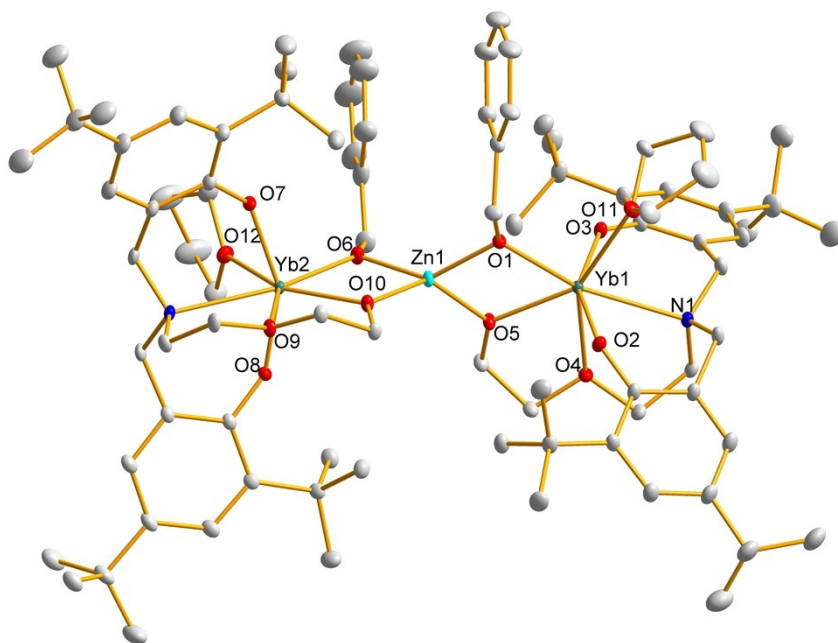

**Figure S7.** Solid state structure of complex **8**·2THF·hex. Thermal ellipsoids are drawn at the 20% probability level. Hydrogen atoms and solvent molecules are omitted for clarity.

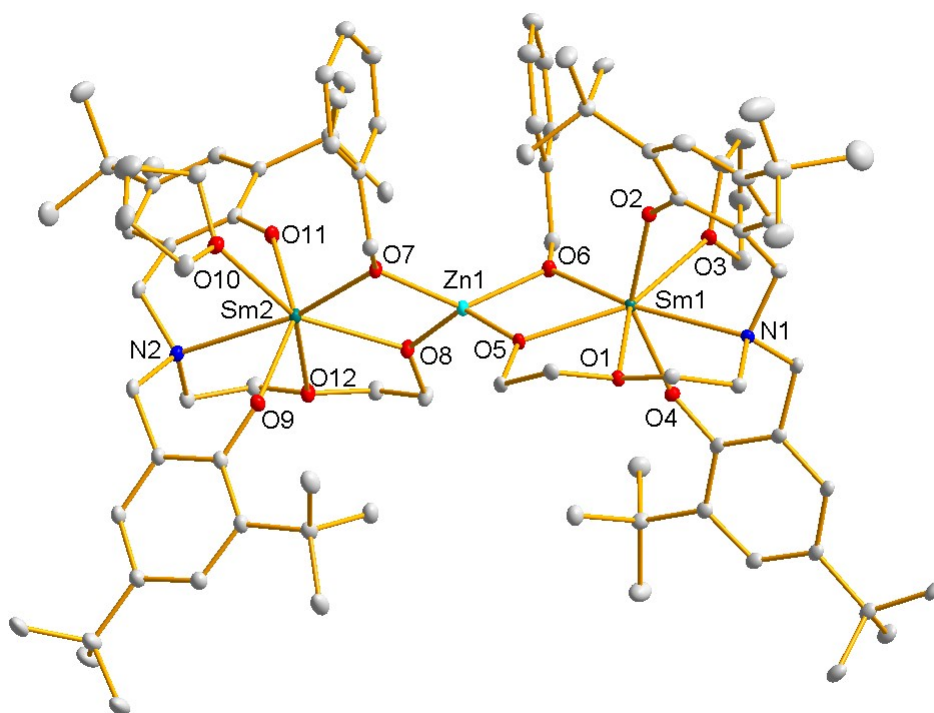

**Figure S8.** Solid state structure of complex **9**·4THF. Thermal ellipsoids are drawn at the 20% probability level. Hydrogen atoms and solvent molecules are omitted for clarity.

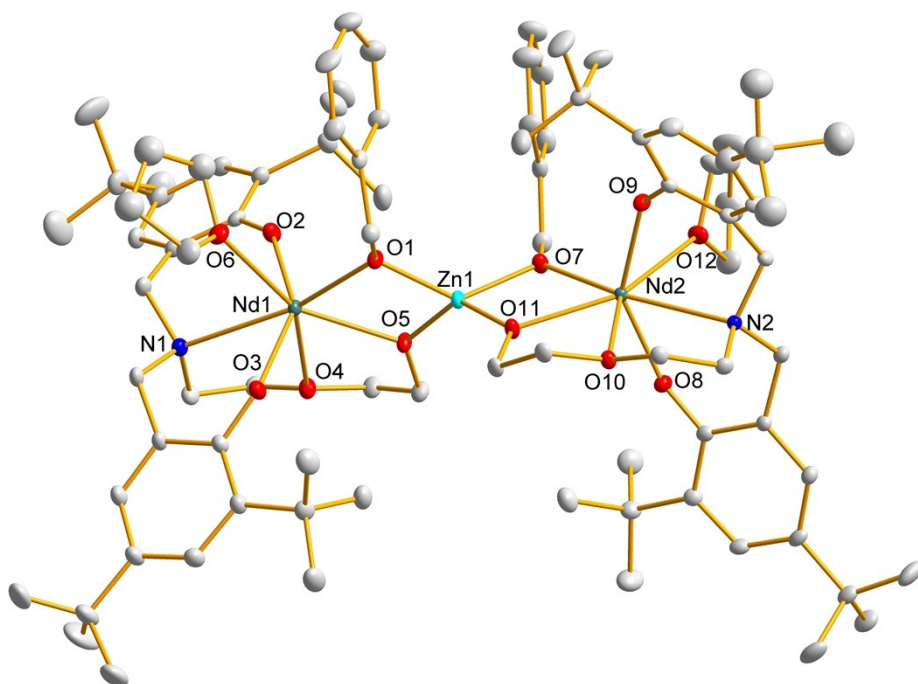

**Figure S9.** Solid state structure of complex **10**·4THF. Thermal ellipsoids are drawn at the 20% probability level. Hydrogen atoms and solvent molecules are omitted for clarity.

## 2. NMR spectra of complexes

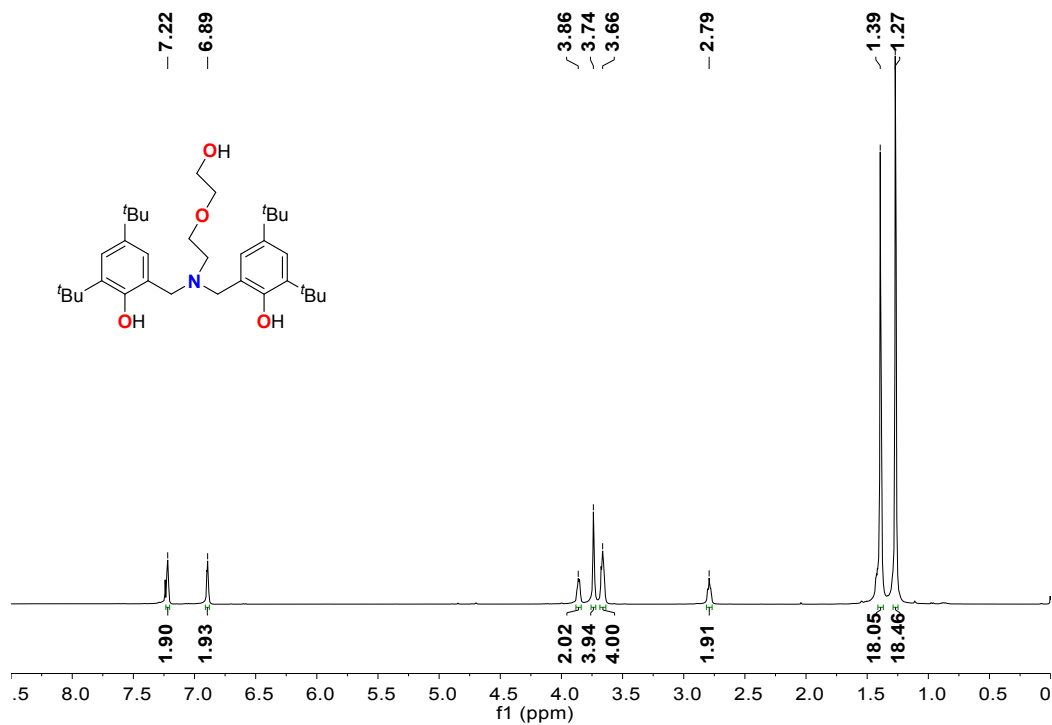

Figure S10. <sup>1</sup>H NMR spectrum of LH<sub>3</sub> in CDCl<sub>3</sub>

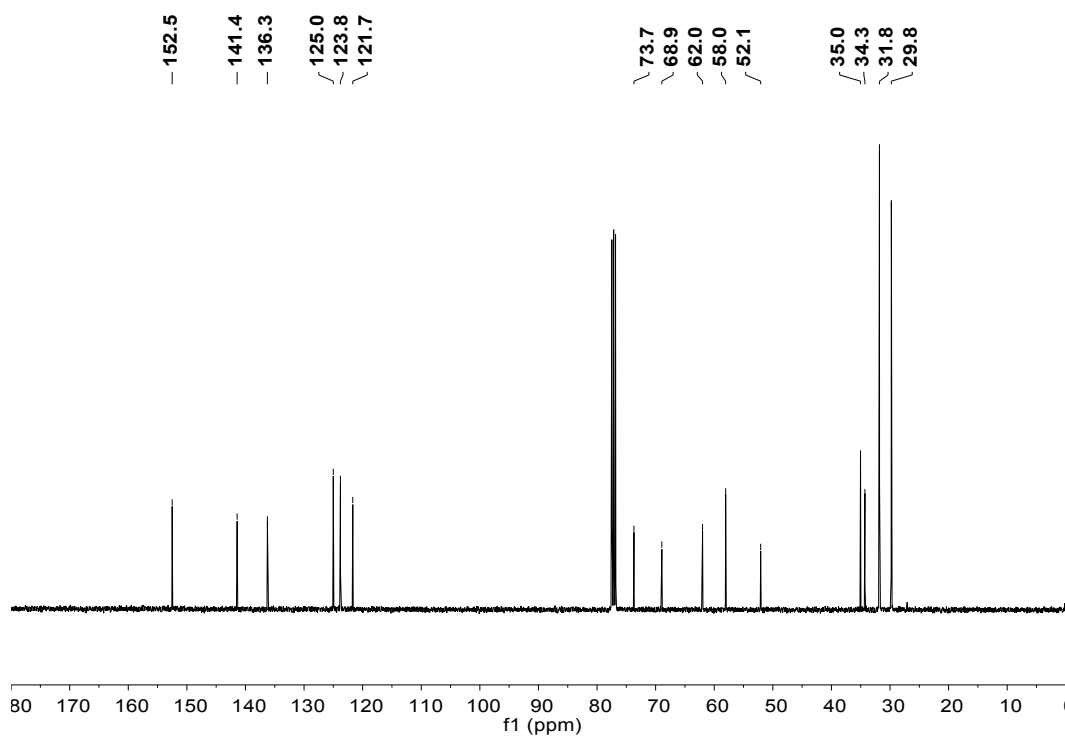

Figure S11. <sup>13</sup>C NMR spectrum of LH<sub>3</sub> in CDCl<sub>3</sub>



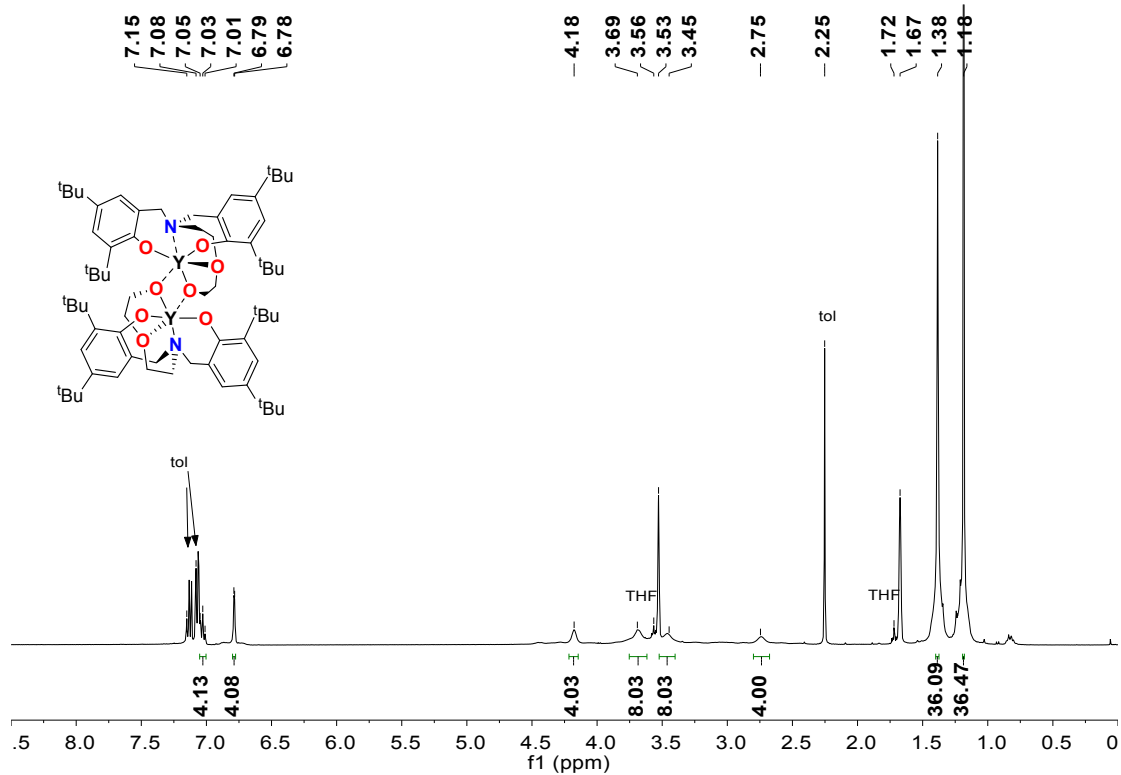

**Figure S12.**  $^1\text{H}$  NMR spectrum of complex 1 in  $\text{THF-}d_8$

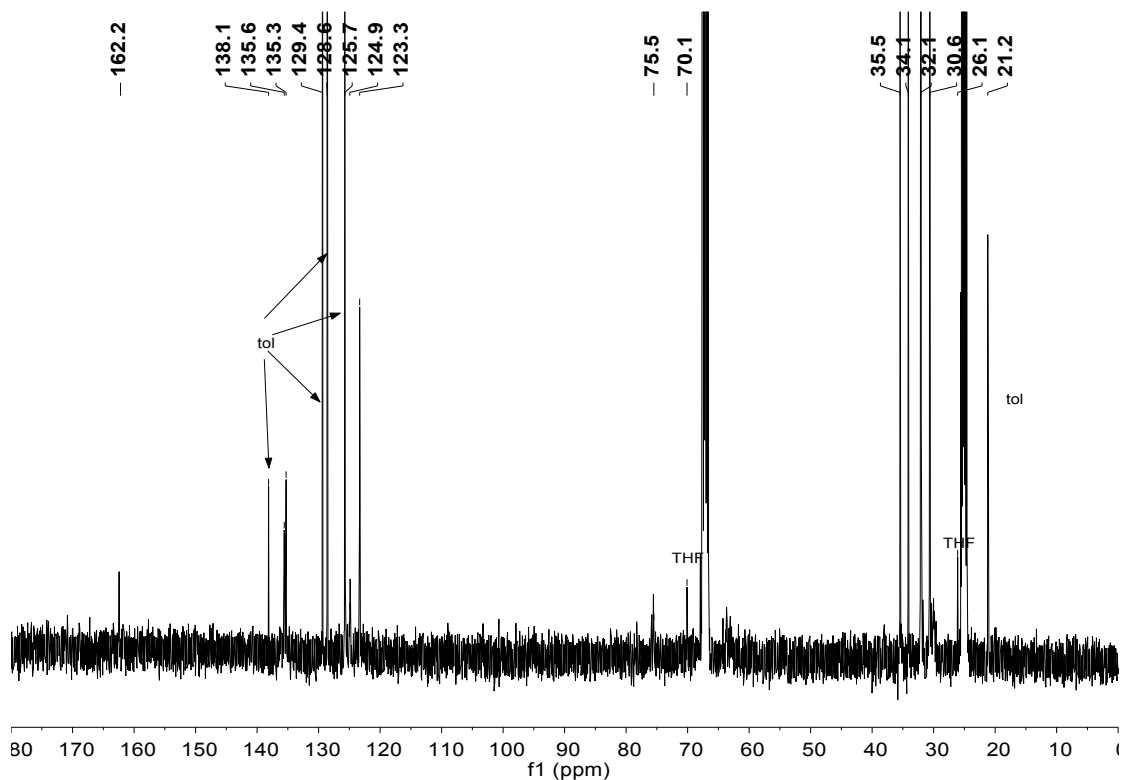

**Figure S13.**  $^{13}\text{C}$  NMR spectrum of complex 1 in  $\text{THF-}d_8$  (poor resolution due to low solubility)

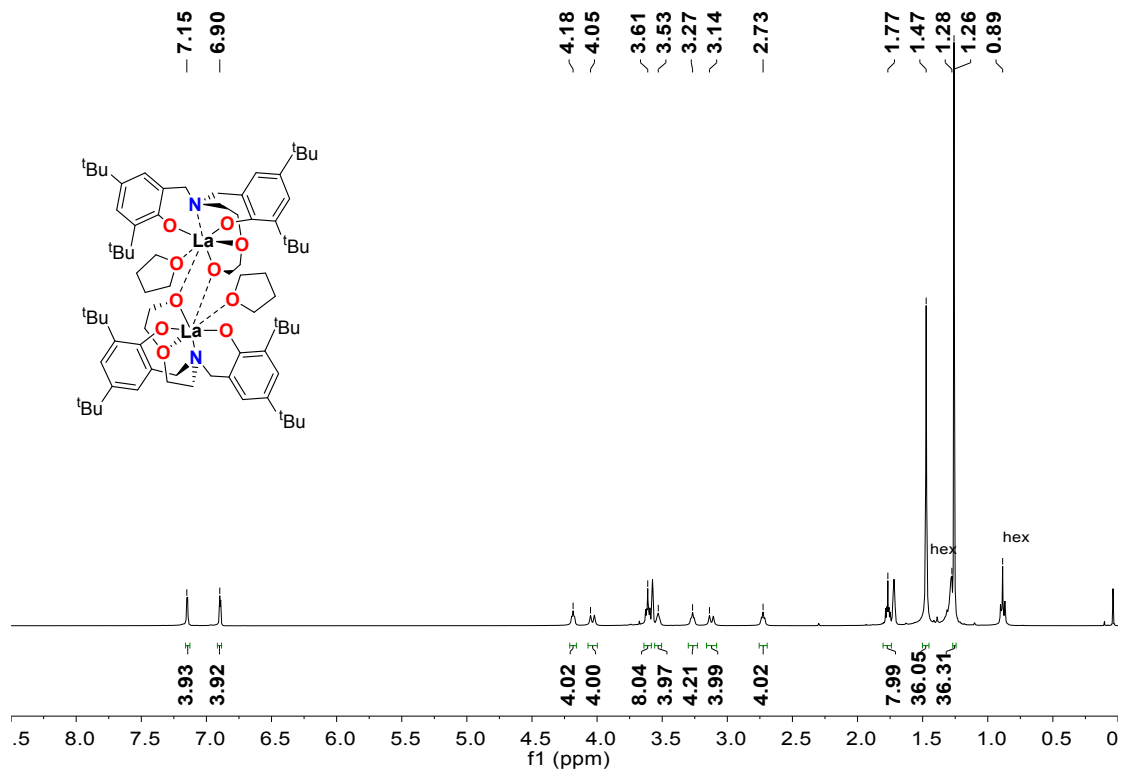

**Figure S14.** <sup>1</sup>H NMR spectrum of complex 4 in THF-*d*<sub>8</sub>

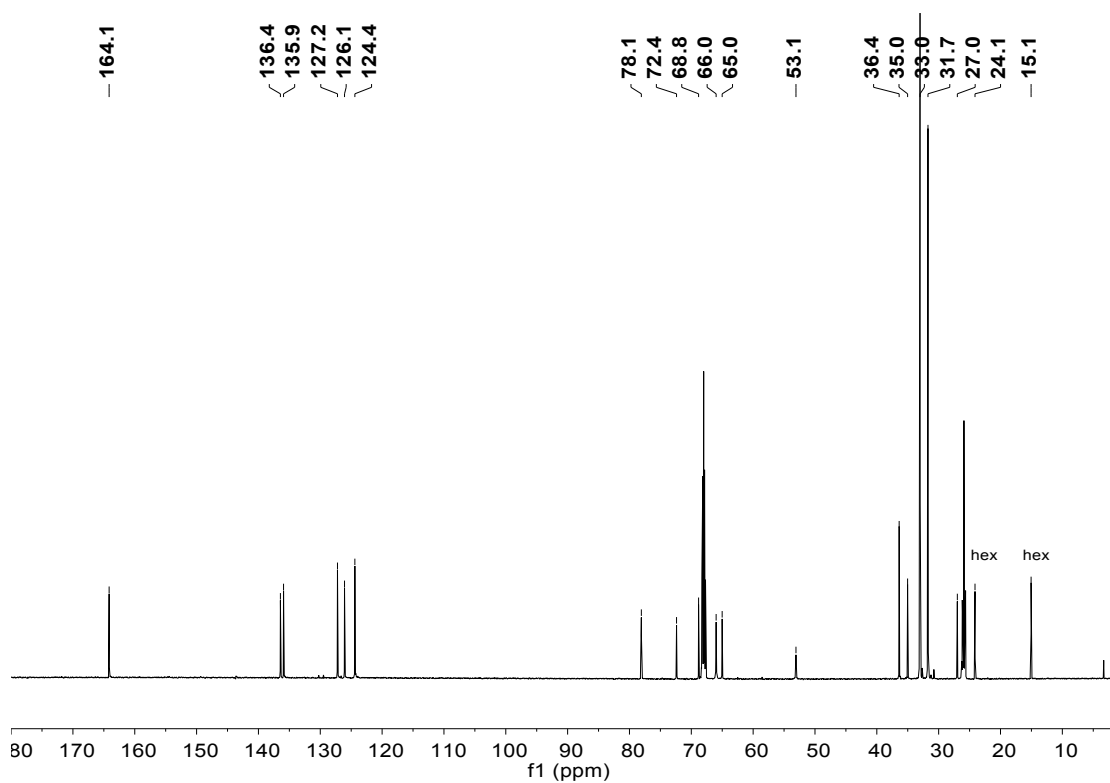

**Figure S15.** <sup>13</sup>C NMR spectrum of complex 4 in THF-*d*<sub>8</sub>

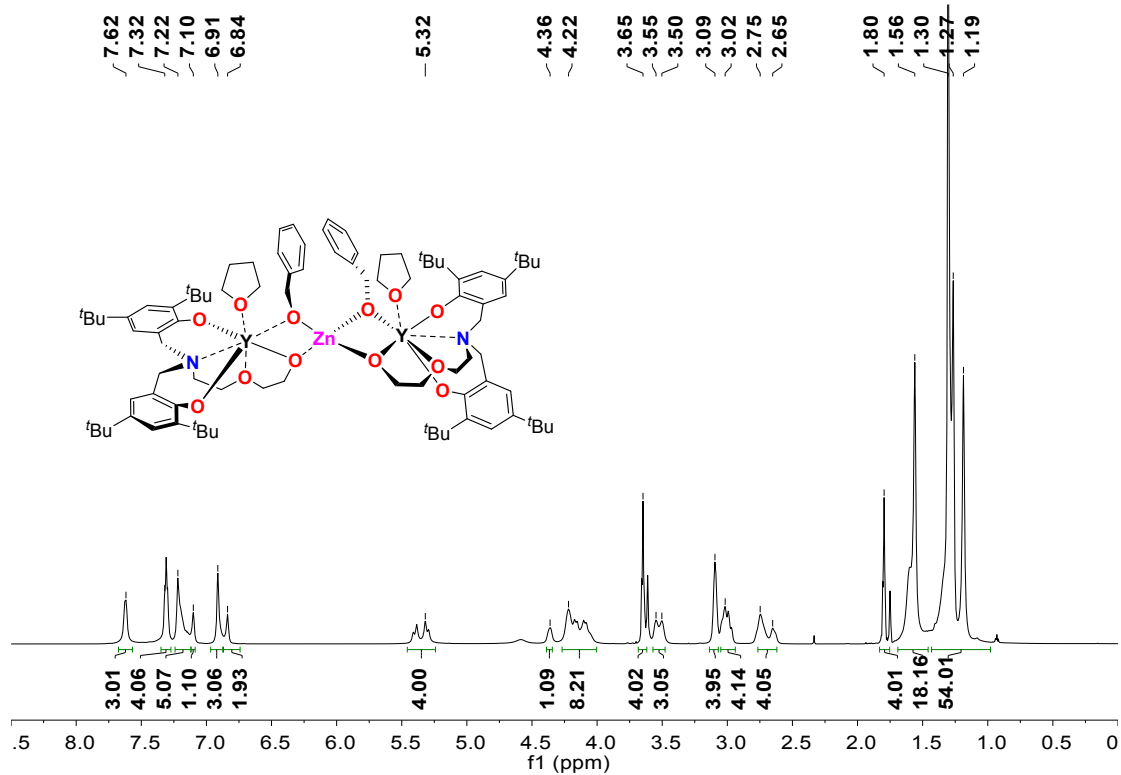

Figure S16. <sup>1</sup>H NMR spectrum of complex 7 in THF-*d*<sub>8</sub>

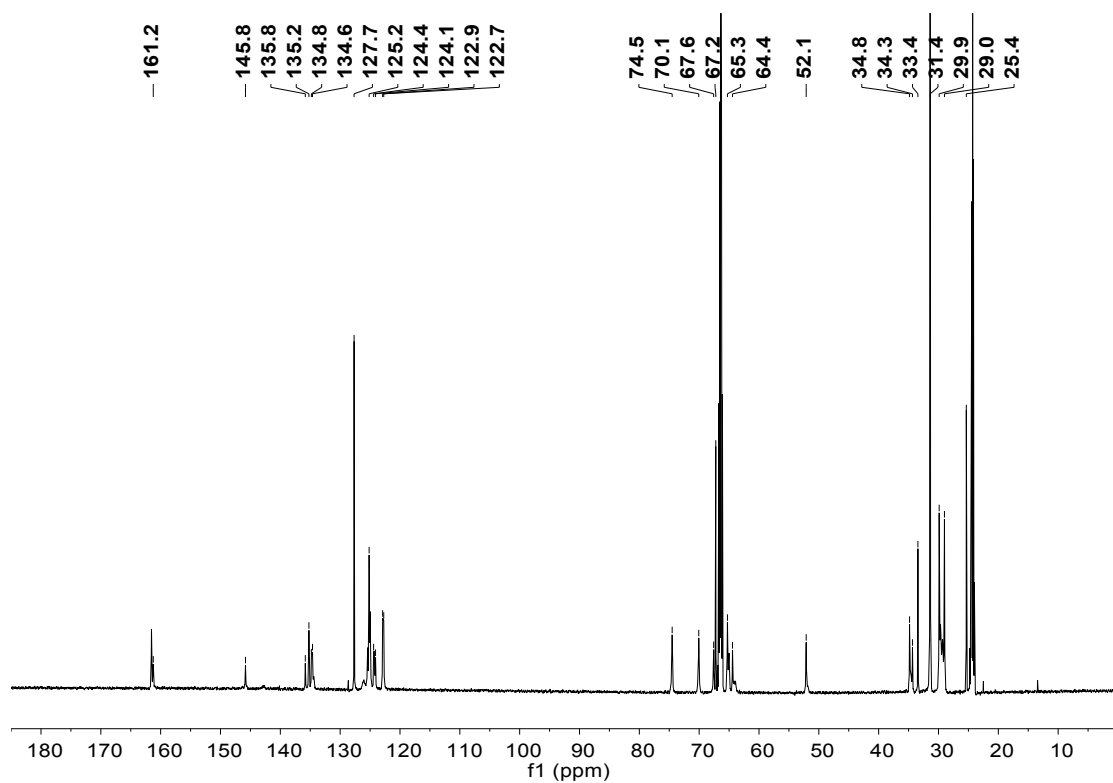

Figure S17. <sup>13</sup>C NMR spectrum of complex 7 in THF-*d*<sub>8</sub>

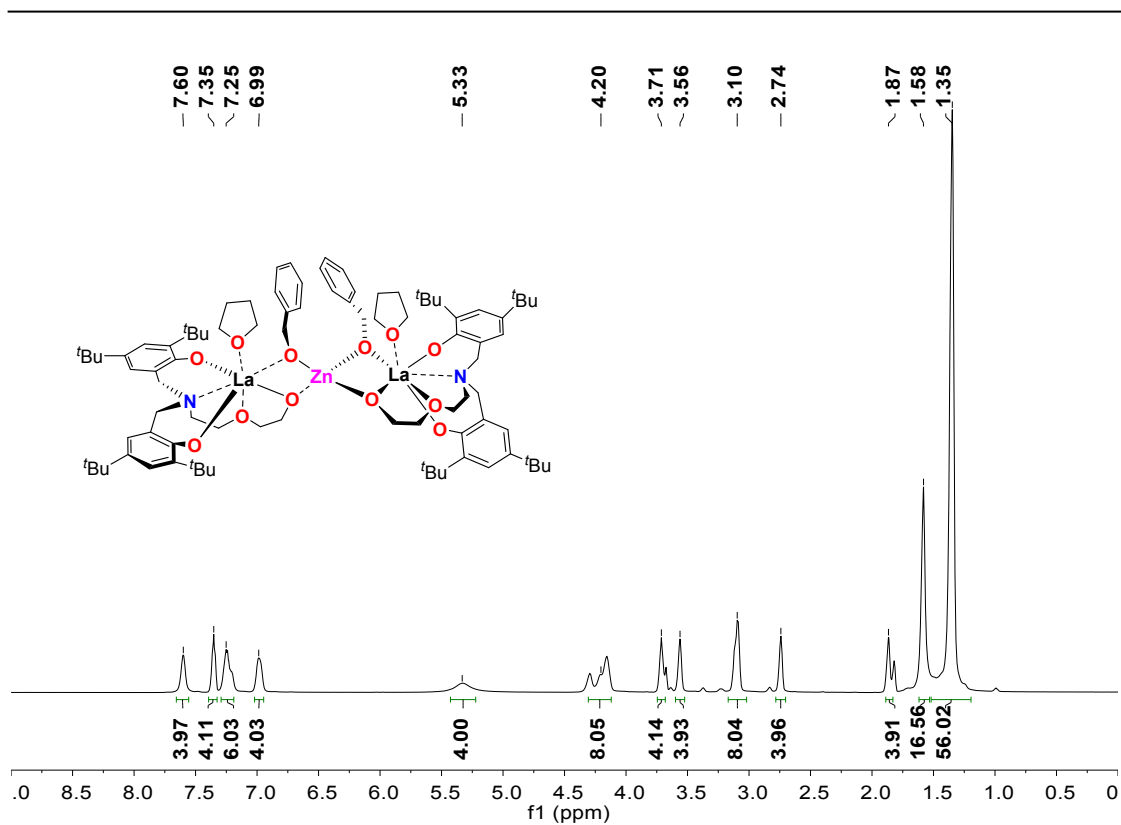

**Figure S18.** <sup>1</sup>H NMR spectrum of complex **11** in THF-*d*<sub>8</sub>

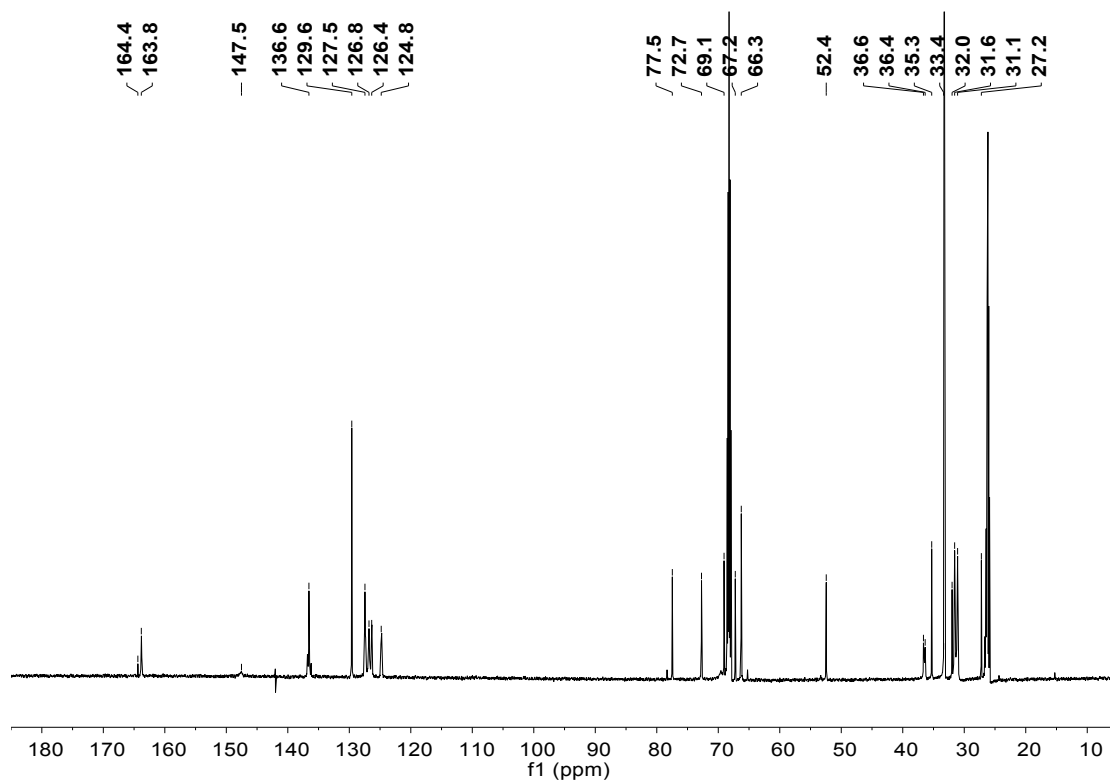

**Figure S19.** <sup>13</sup>C NMR spectrum of complex **11** in THF-*d*<sub>8</sub>

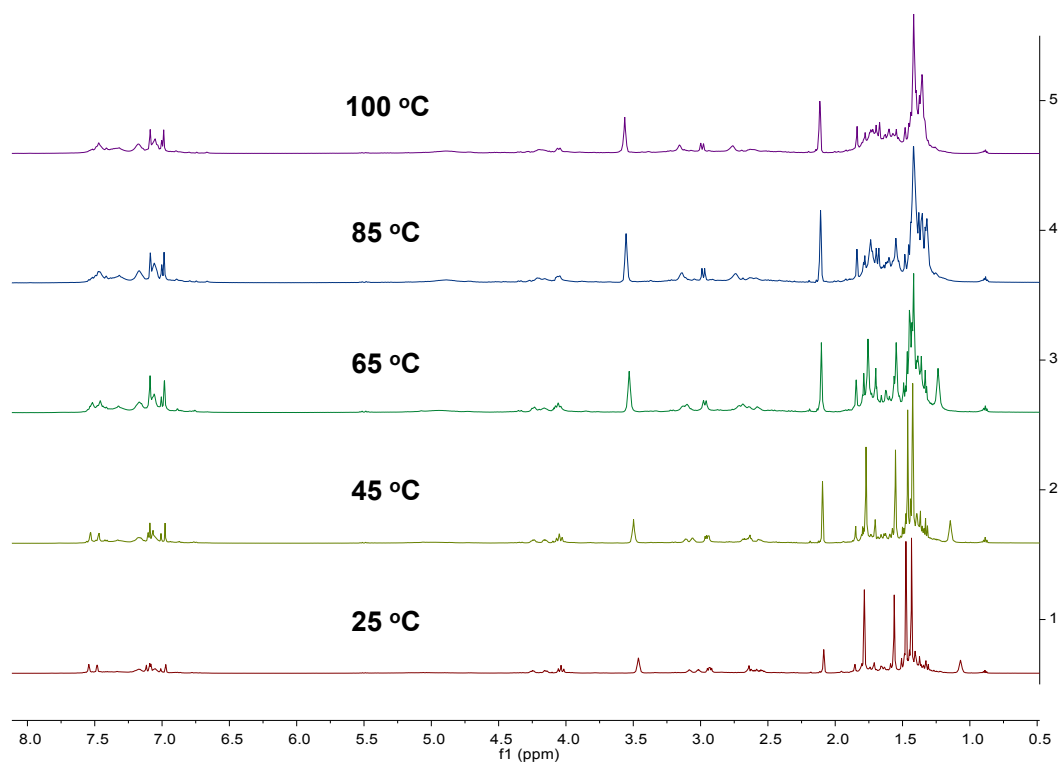

**Figure S20.** Variable temperature <sup>1</sup>H NMR spectra of complex **11** (600 MHz, Tol-*d*<sub>8</sub>)

### 3. DOSY analysis of complexes 4 and 11

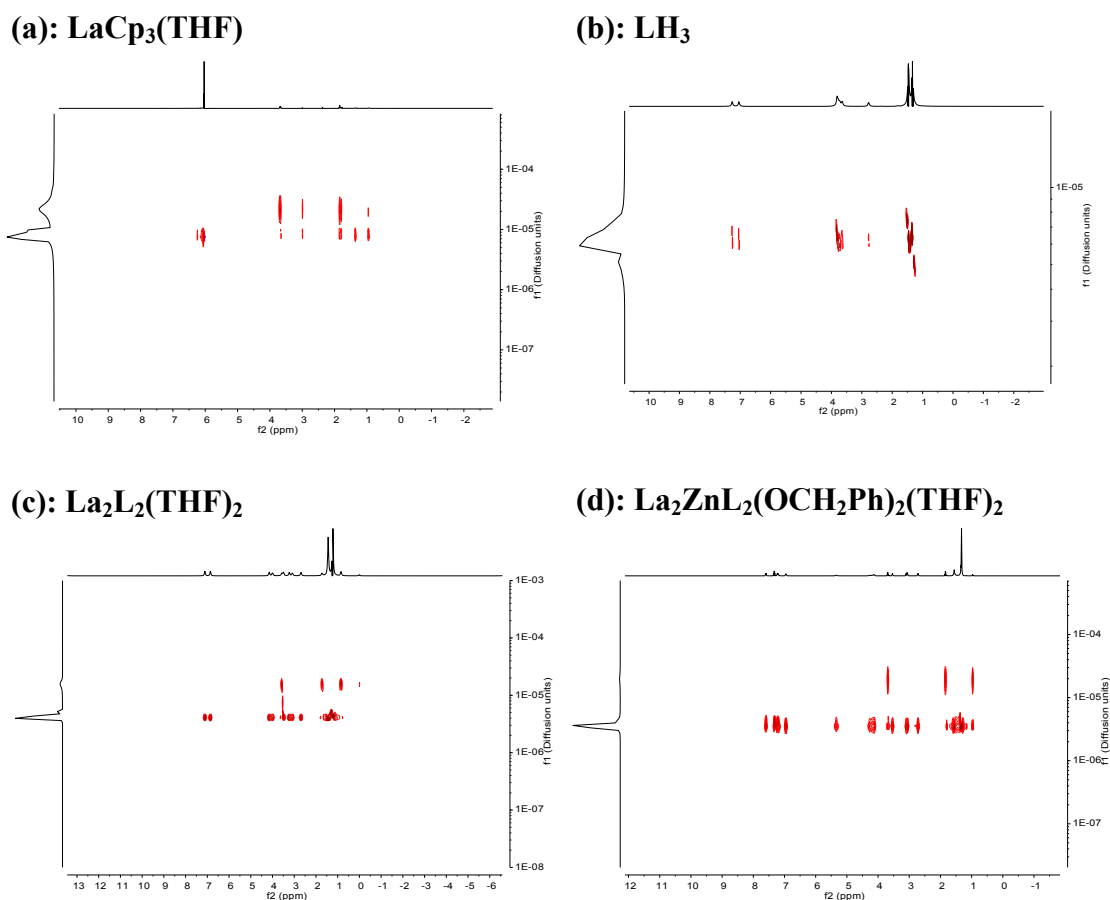

**Figure S21.**  $^1\text{H}$  DOSY spectrum of  $\text{LaCp}_3(\text{THF})$ ,  $\text{H}_3\text{L}$ , complexes **4** and **11**. Conditions: all samples were dissolved in  $\text{THF-}d_8$  with the same concentration of 0.056 M, 25 °C. The values of the translational diffusion coefficient ( $D$ ) were calculated by the Bruker Topspin 3.2 program.

**Table S1** D-Mw Correlation Result of DOSY Data

| Compound                     | theoretical      |           | $\times 10^6 D$<br>( $\text{cm}^2/\text{s}$ ) | log D | calculated       |            |
|------------------------------|------------------|-----------|-----------------------------------------------|-------|------------------|------------|
|                              | $M_w$<br>(g/mol) | log $M_w$ |                                               |       | $M_w$<br>(g/mol) | %<br>error |
| <b>LaCp<sub>3</sub>(THF)</b> | 406              | 2.61      | 7.58                                          | -5.12 | 406              | 0.00       |
| <b>H<sub>3</sub>L</b>        | 542              | 2.73      | 6.55                                          | -5.18 | 545              | 0.55       |
| <b>4</b>                     | 1498             | 3.18      | 4.02                                          | -5.40 | 1461             | 2.47       |
| <b>11</b>                    | 1776             | 3.25      | 3.61                                          | -5.44 | 1815             | 2.20       |

## 4. Crystallographic radius analysis of complexes 4 and 11

**Table S2** Comparison of the dimensions of complexes **4** and **11** in the solid state as determined by X-ray crystallography and the dimensions in solution as determined by DOSY NMR experiments.

| Complex   | Hydrodynamic radius<br>$R_h$ (Å) | Crystalline radius |                |                   |
|-----------|----------------------------------|--------------------|----------------|-------------------|
|           |                                  | $R_{max}$ (Å)      | $R_{min}$ (Å)  | $R_{average}$ (Å) |
| <b>4</b>  | $11.6 \pm 0.5$                   | $12.1 \pm 0.5$     | $9.0 \pm 0.5$  | $10.6 \pm 0.5$    |
| <b>11</b> | $12.9 \pm 0.5$                   | $13.1 \pm 0.5$     | $10.8 \pm 0.5$ | $12.0 \pm 0.5$    |

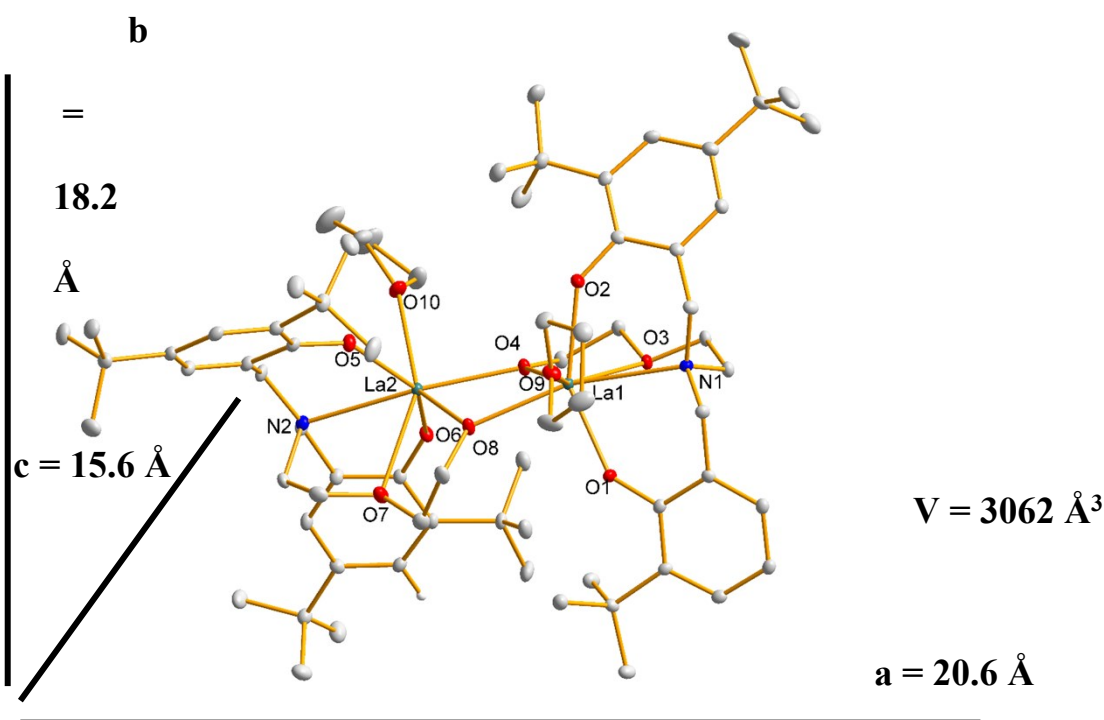

**Figure S22.** Geometrical parameters ( $a = 20.6$ ,  $b = 18.2$ ,  $c = 15.6$  Å) used for the volume estimation of complex **4** based on its solid-state structure. Following an ellipsoidal model [ $V = 4/3 \pi (a/2 \times b/2 \times c/2)$ ] was used for volume estimation of  $3062$  Å<sup>3</sup>.

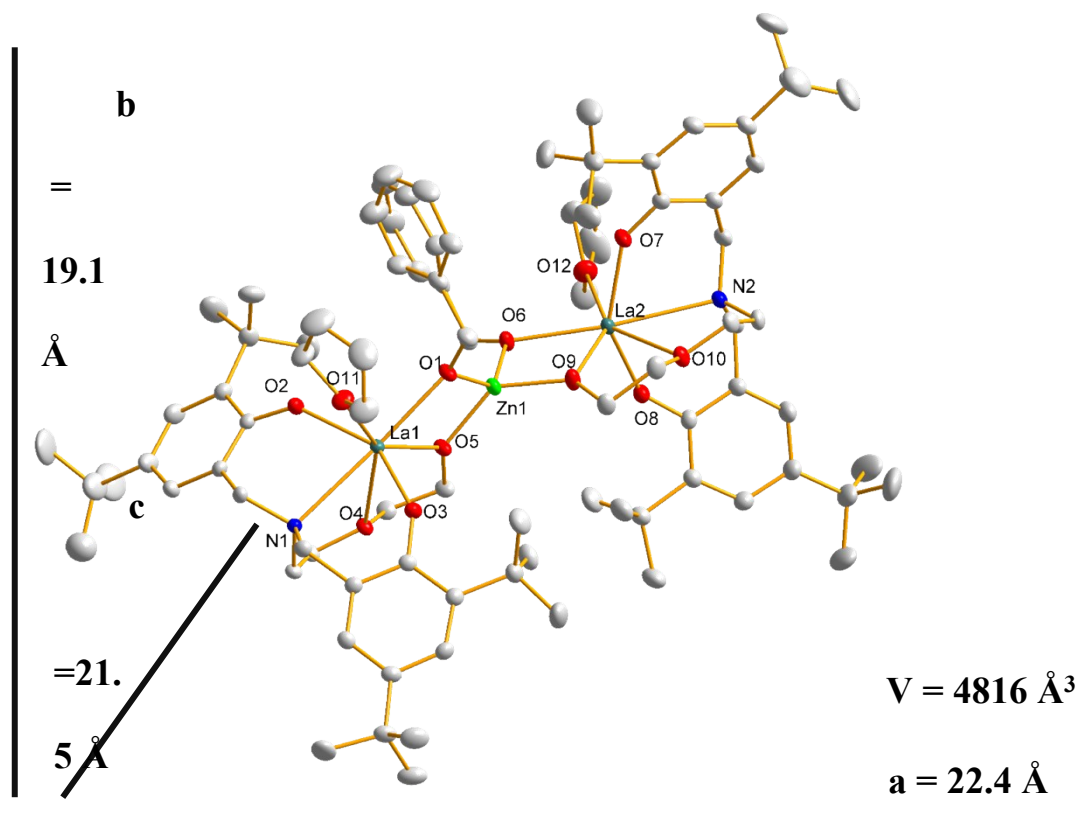

**Figure S23.** Geometrical parameters ( $a = 22.4$ ,  $b = 19.1$ ,  $c = 21.5 \text{ \AA}$ ) used for the volume estimation of complex **11** based on its solid-state structure. Following an ellipsoidal model [ $V = 4/3 \pi (a/2 \times b/2 \times c/2)$ ] was used for volume estimation of  $4816 \text{ \AA}^3$ .



## 5. NMR spectra of cyclic carbonates

$^1\text{H}$  NMR spectrum of 4-butyl-1,3-dioxolan-2-one in  $\text{CDCl}_3$

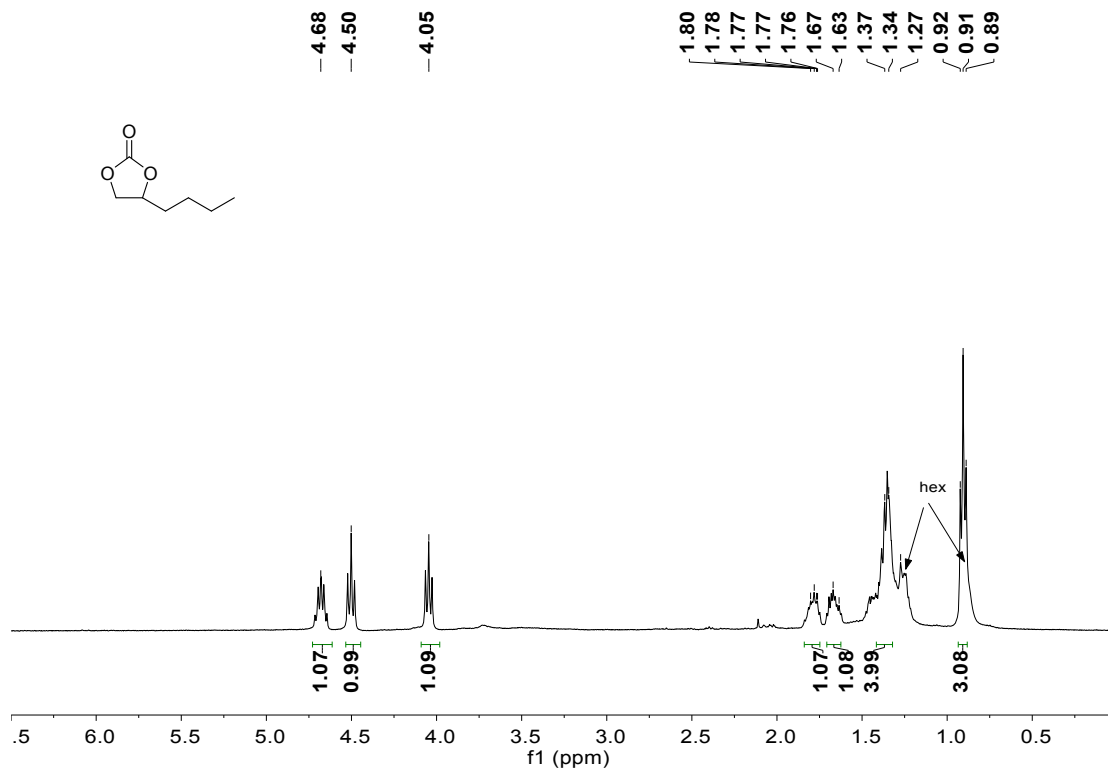

$^1\text{H}$  NMR spectrum of **12b** in  $\text{CDCl}_3$

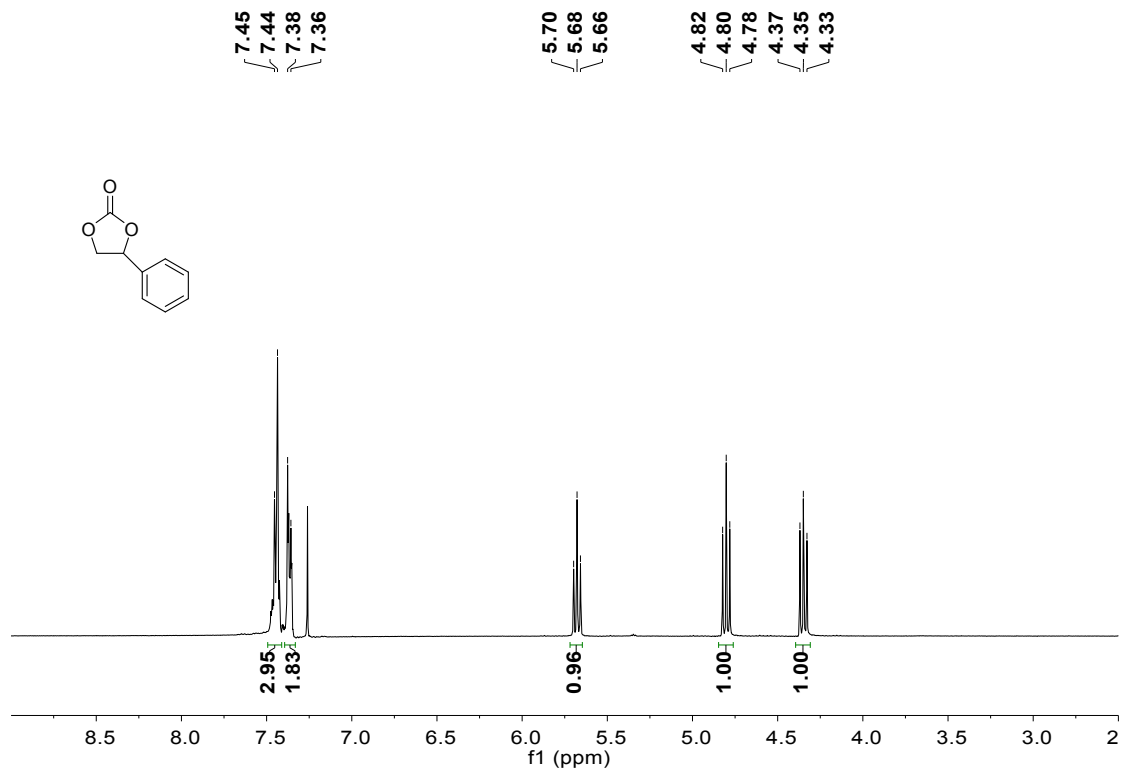

$^1\text{H}$  NMR spectrum of **12c** in  $\text{CDCl}_3$

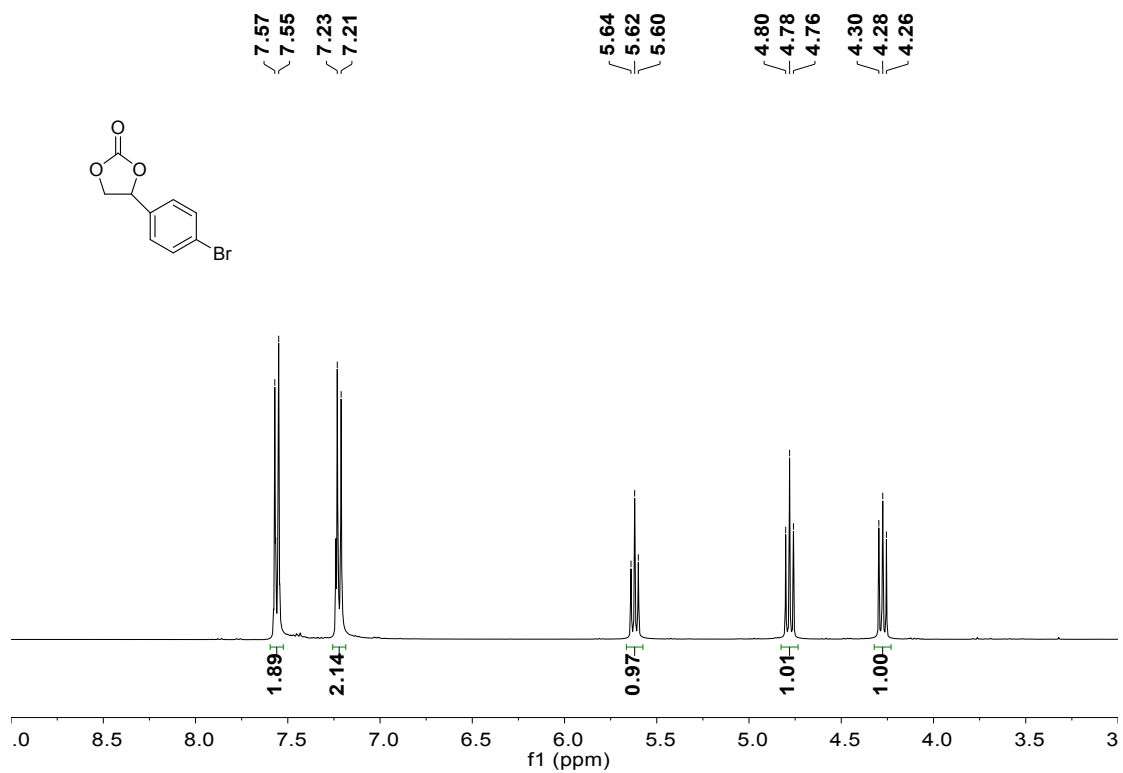

$^1\text{H}$  NMR spectrum of **12d** in  $\text{CDCl}_3$

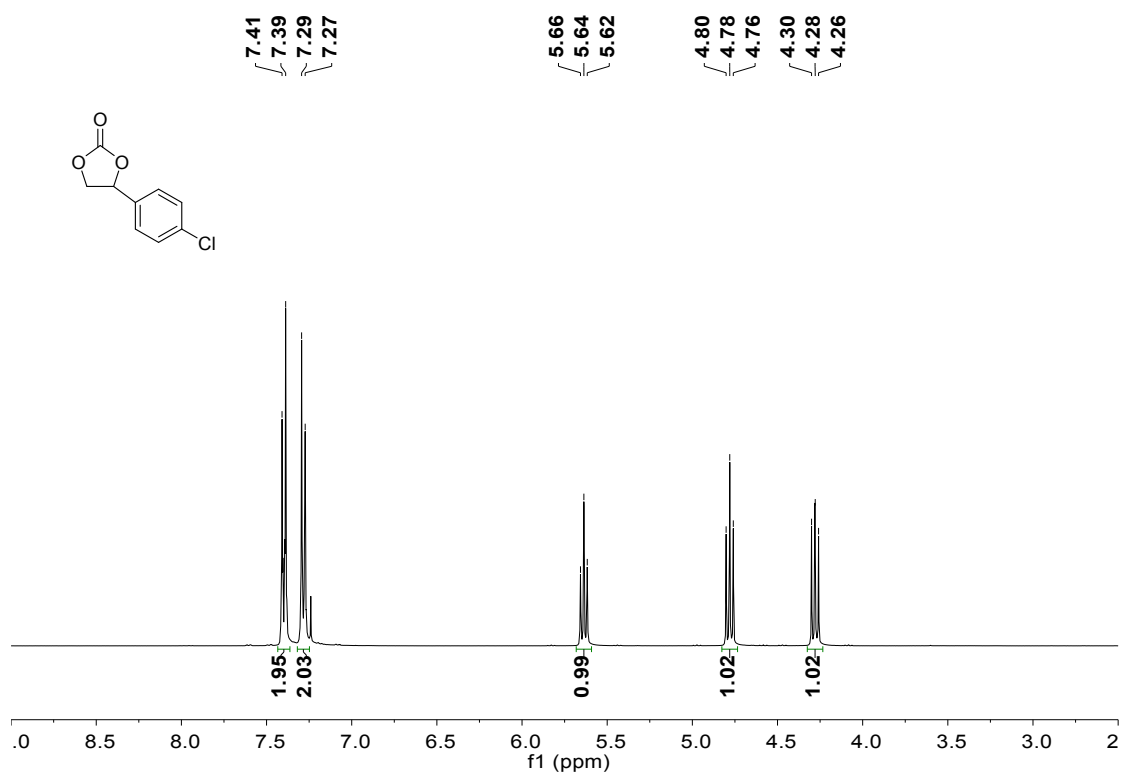

$^1\text{H}$  NMR spectrum of **12e** in  $\text{CDCl}_3$

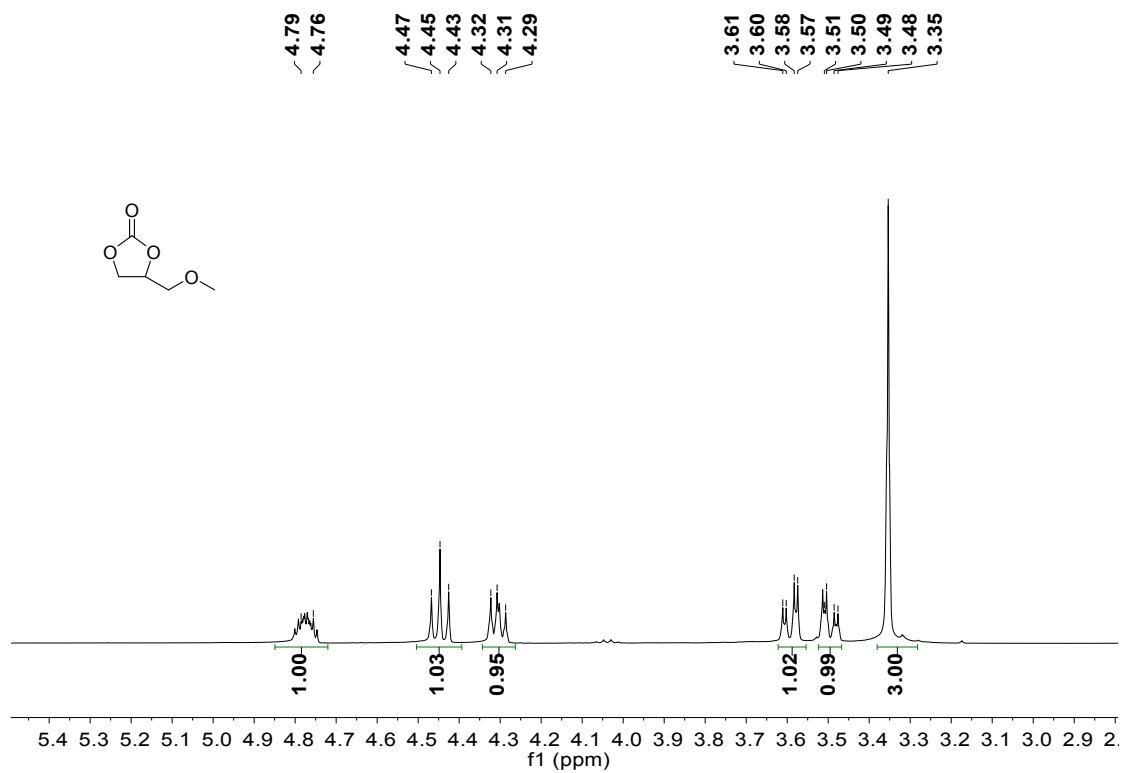

$^1\text{H}$  NMR spectrum of **12f** in  $\text{CDCl}_3$

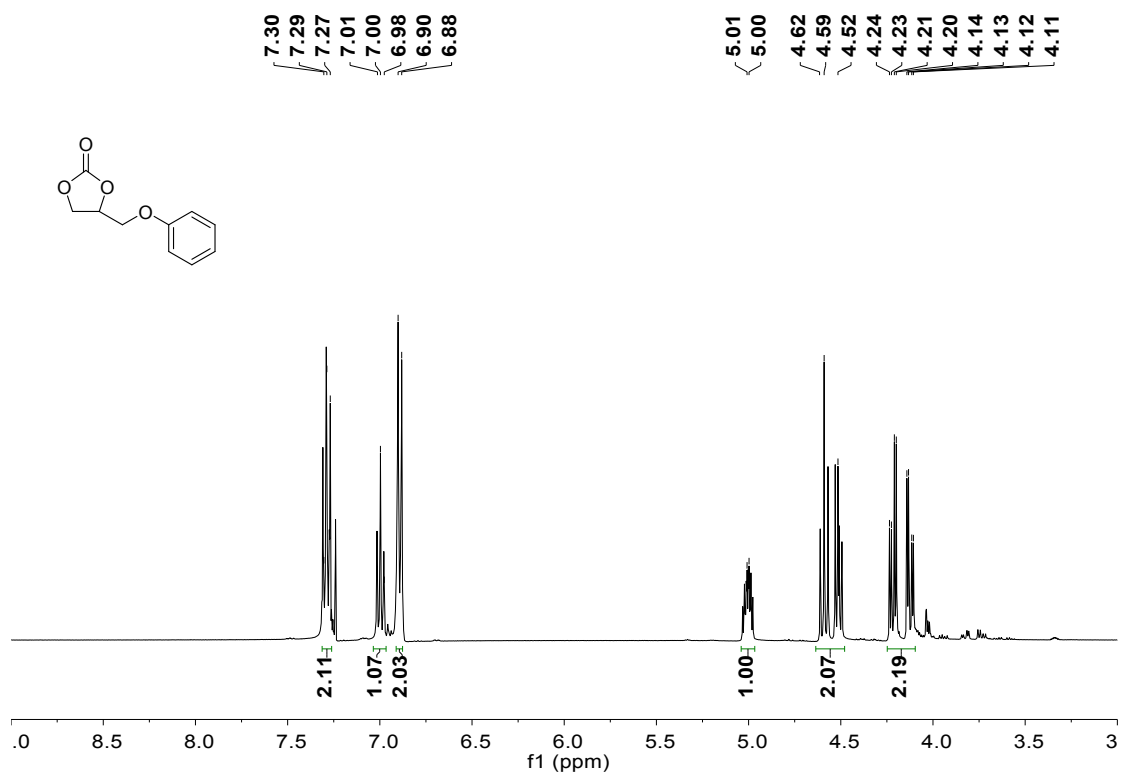

$^1\text{H}$  NMR spectrum of **12g** in  $\text{CDCl}_3$

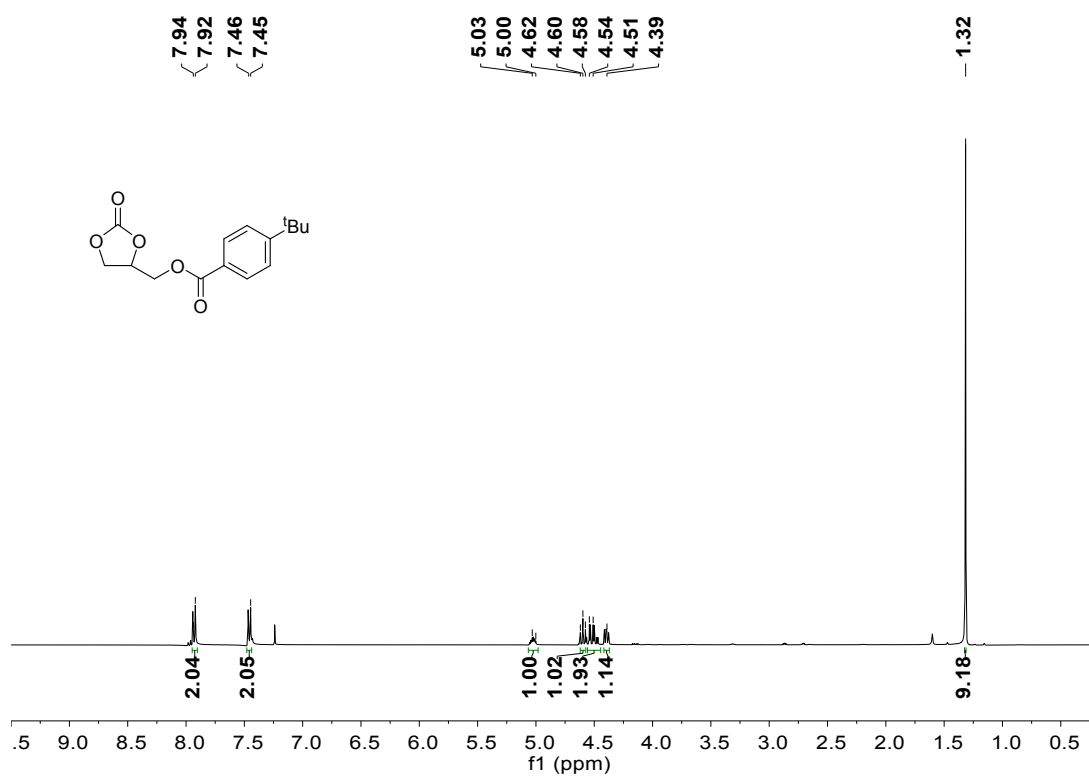

$^1\text{H}$  NMR spectrum of **12h** in  $\text{CDCl}_3$

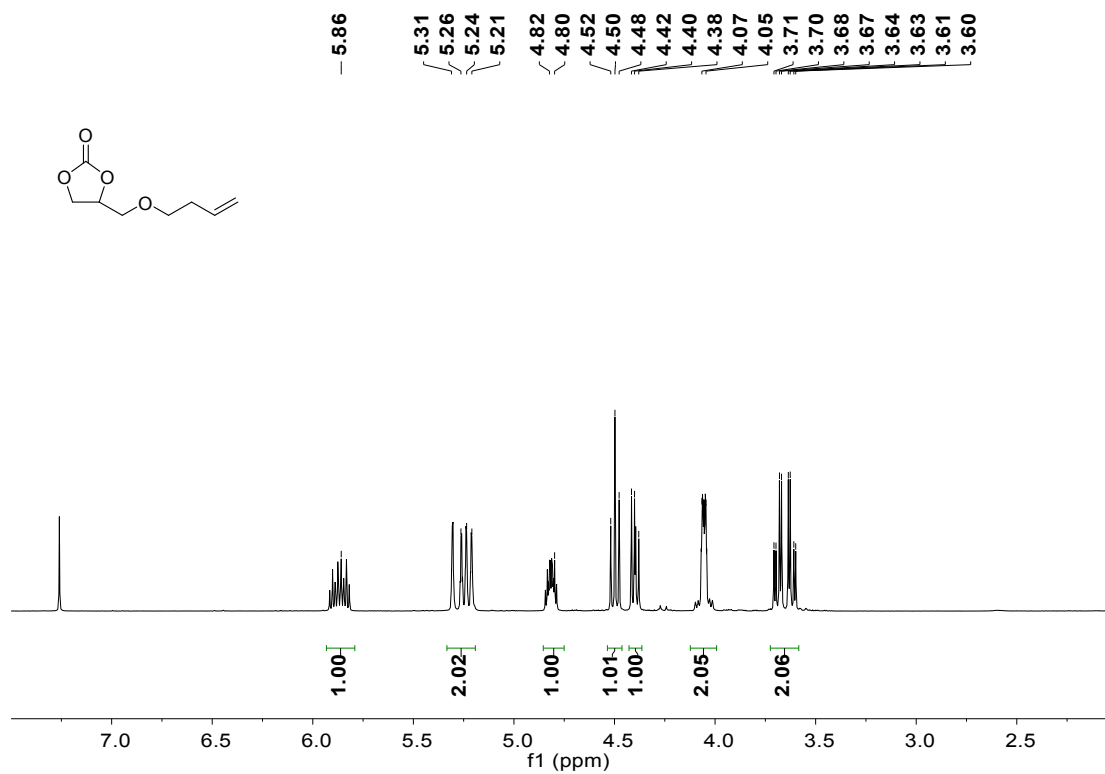

$^1\text{H}$  NMR spectrum of **12i** in  $\text{CDCl}_3$

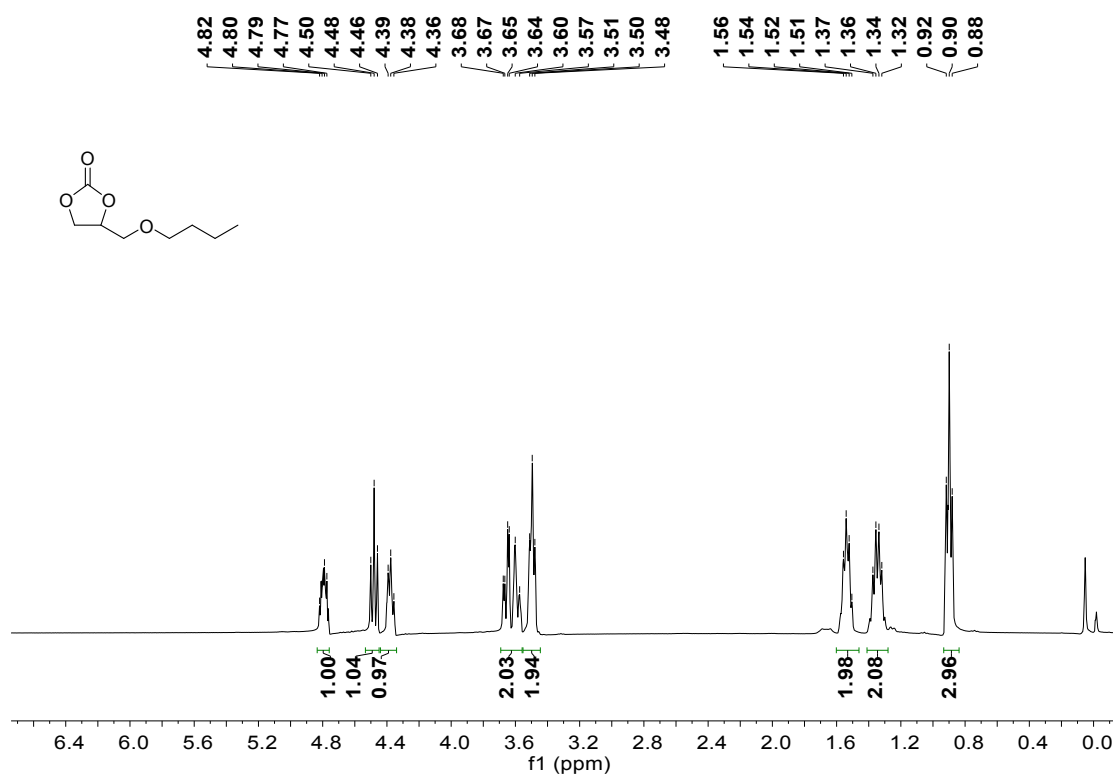

$^1\text{H}$  NMR spectrum of **12j** in  $\text{CDCl}_3$

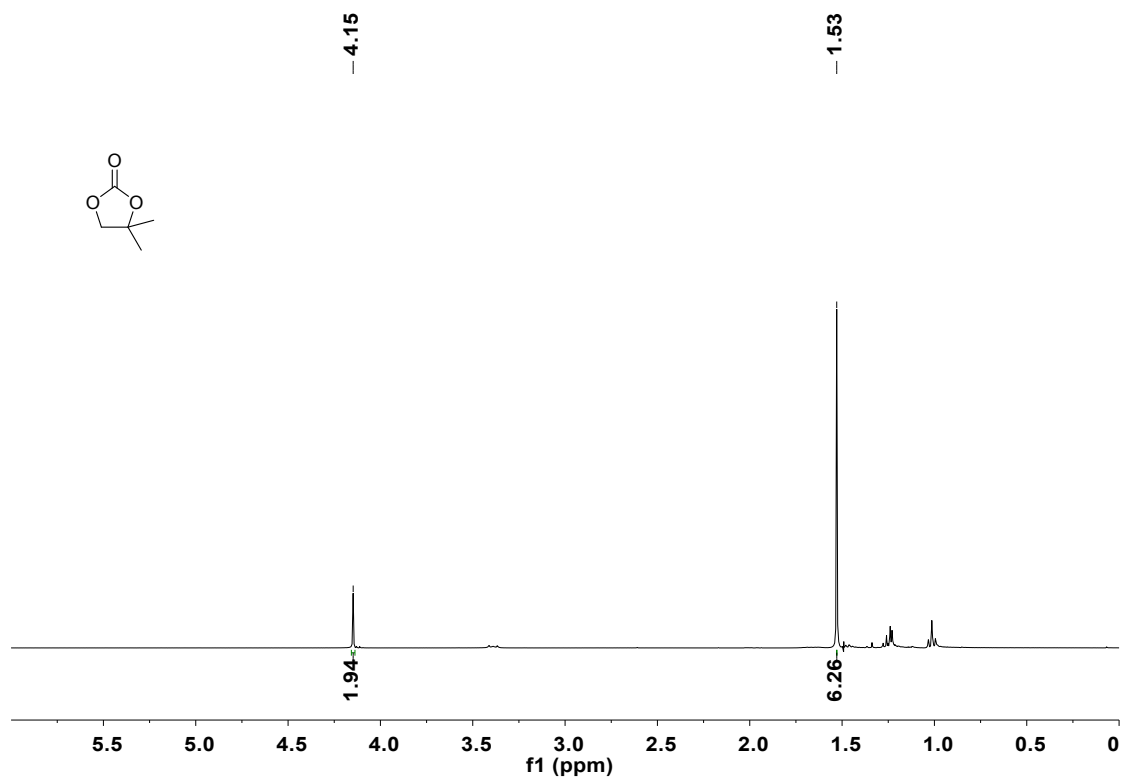

$^1\text{H}$  NMR spectrum of **12k** (purified) in  $\text{CDCl}_3$

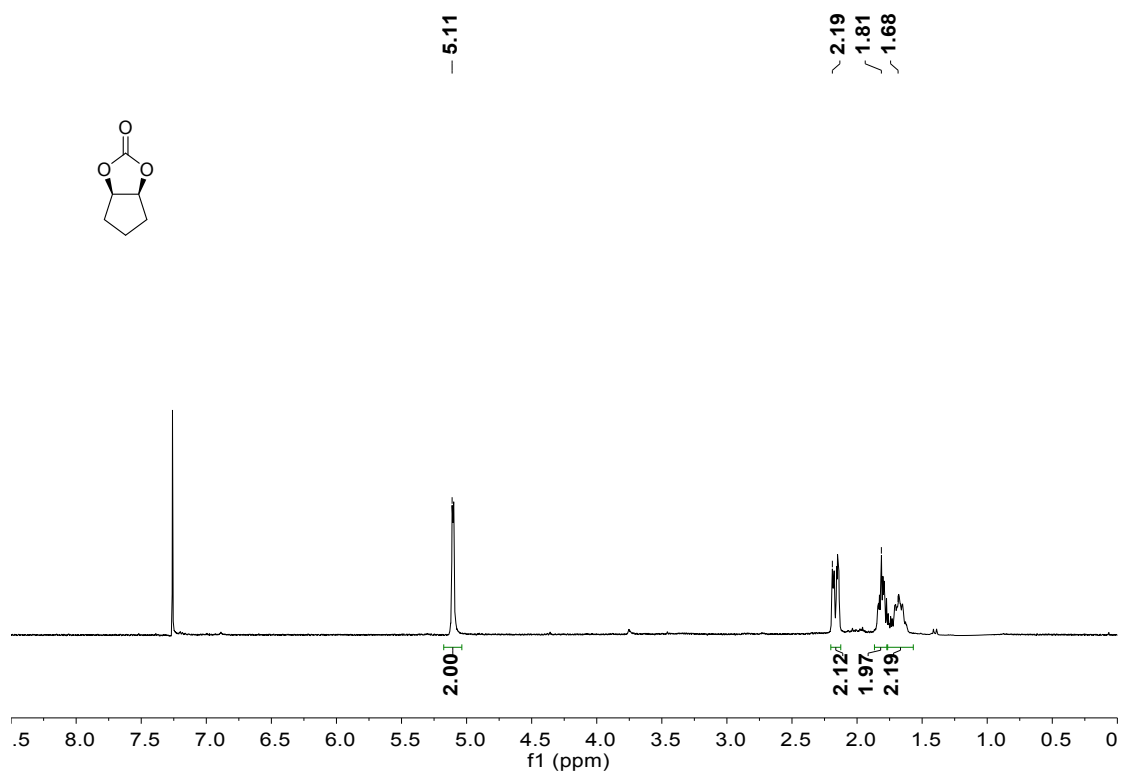

$^1\text{H}$  NMR spectrum of **12k** (mixture) in  $\text{CDCl}_3$

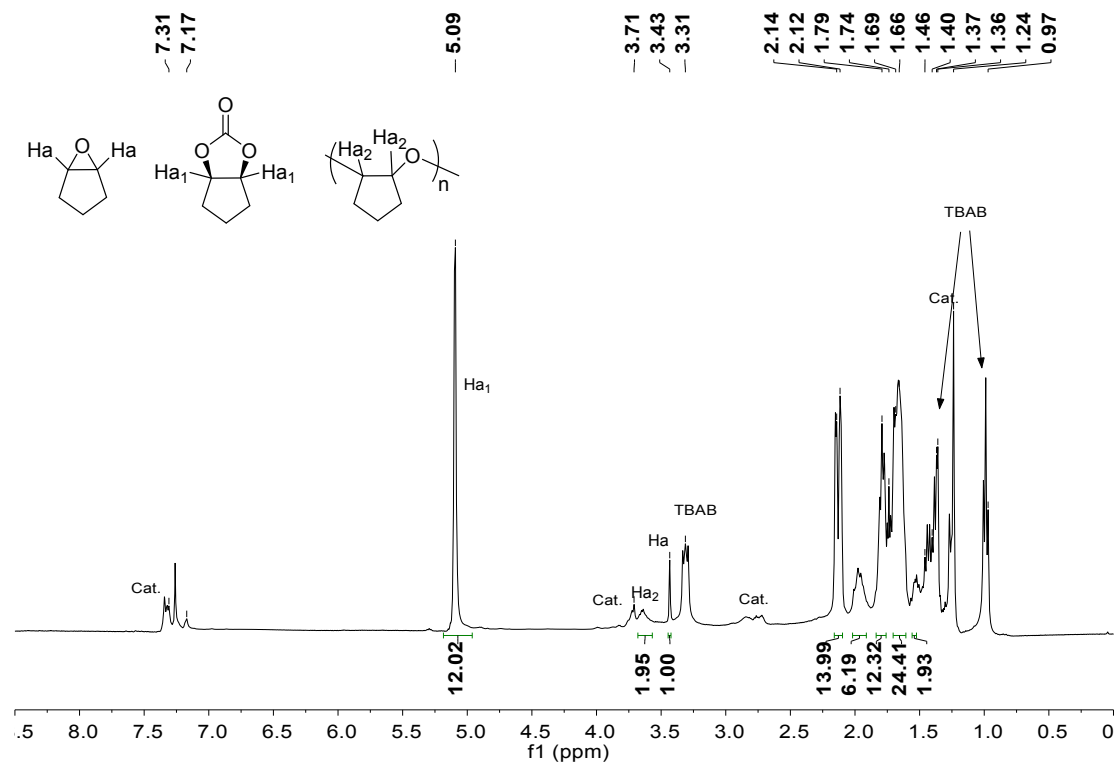

$^1\text{H}$  NMR spectrum of **12I** (purified) in  $\text{CDCl}_3$

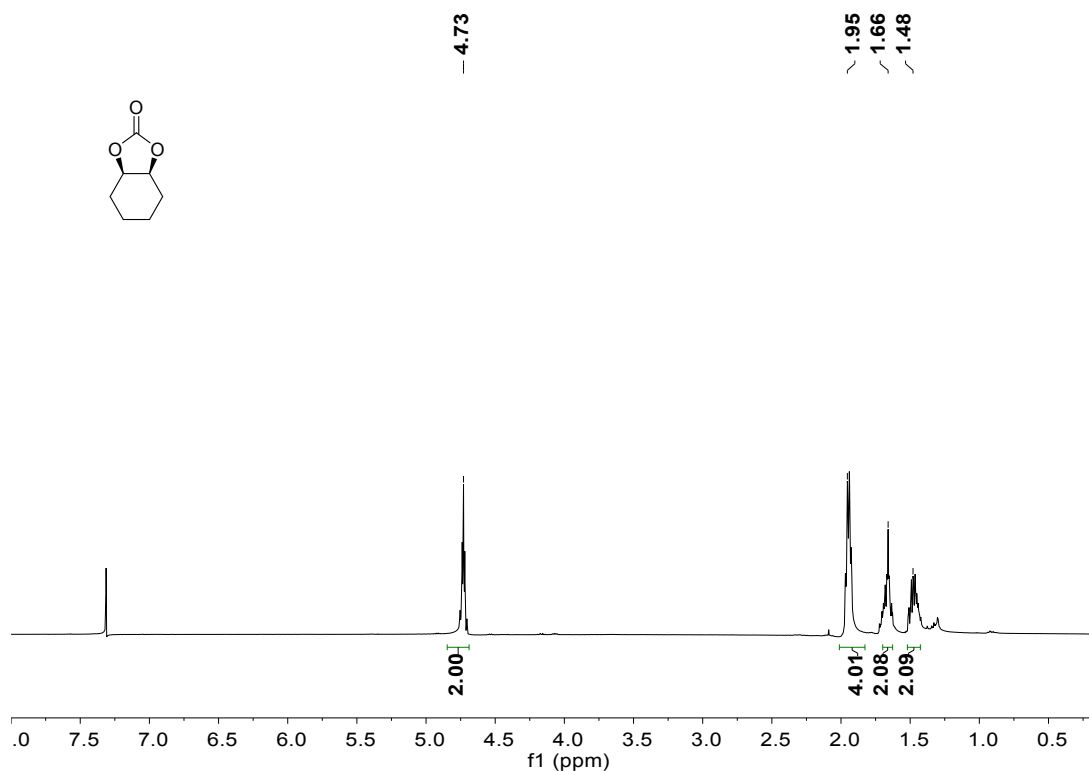

$^1\text{H}$  NMR spectrum of **12I** (mixture) in  $\text{CDCl}_3$

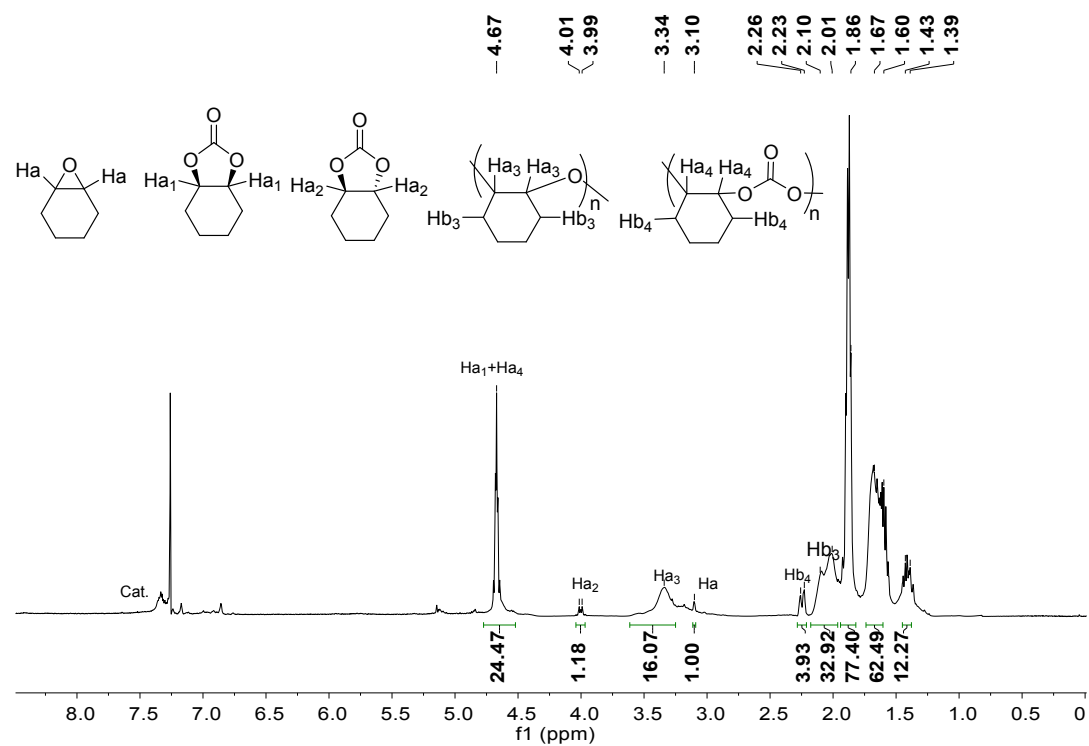

$^1\text{H}$  NMR spectrum of **12i** (mixture) in  $\text{CDCl}_3$  (30 atm  $\text{CO}_2$ )

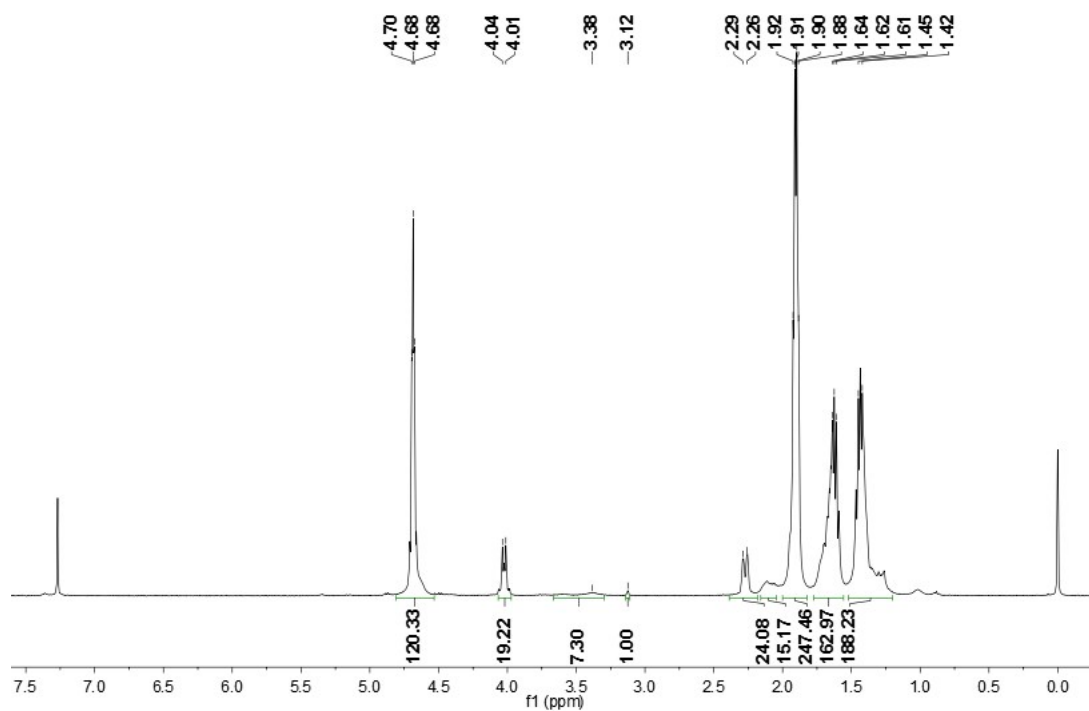

$^1\text{H}$  NMR spectrum of **12m** (purified) in  $\text{CDCl}_3$

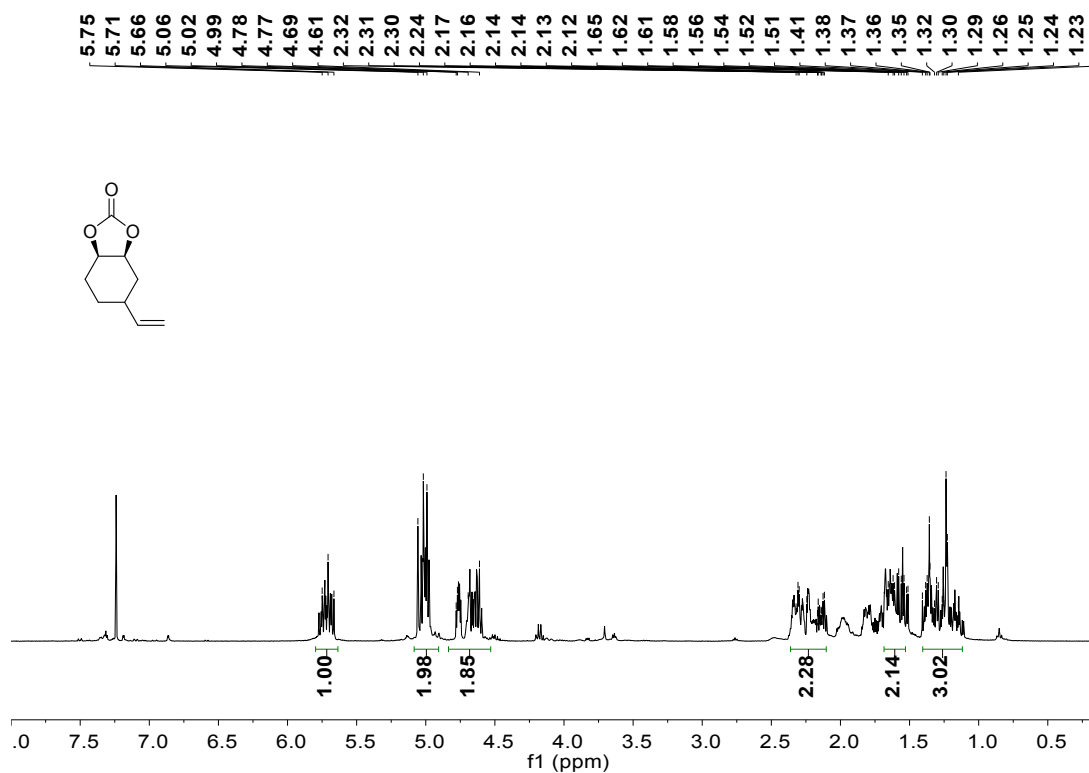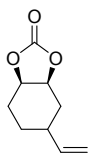



$^1\text{H}$  NMR spectrum of **12m** (mixture) in  $\text{CDCl}_3$

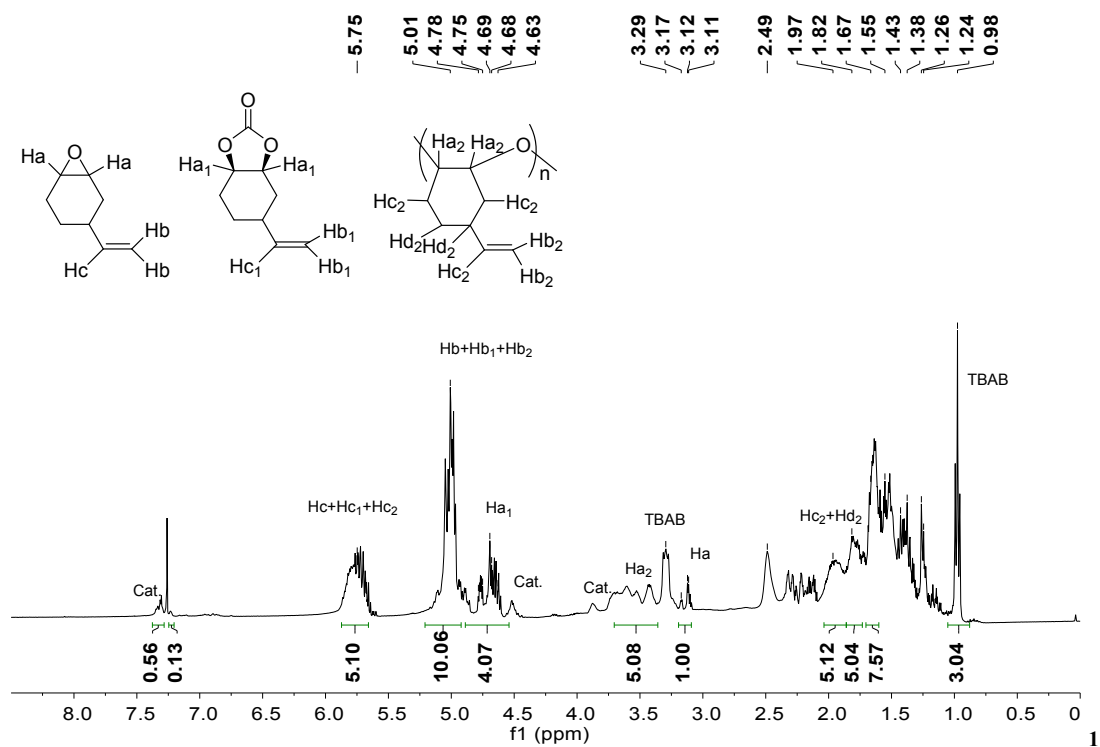

---

## 6. Crystallographic data of complexes 1-11

**Table S3** Crystallographic data of complexes 1-2

| complexes                                   | 1·3tol                                                                        | 2·3tol                                                                         |
|---------------------------------------------|-------------------------------------------------------------------------------|--------------------------------------------------------------------------------|
| Empirical formula                           | C <sub>89</sub> H <sub>128</sub> N <sub>2</sub> O <sub>8</sub> Y <sub>2</sub> | C <sub>89</sub> H <sub>128</sub> N <sub>2</sub> O <sub>8</sub> Yb <sub>2</sub> |
| Formula weight                              | 1531.75                                                                       | 1700.01                                                                        |
| Temperature/K                               | 99.99                                                                         | 120.01                                                                         |
| Crystal system                              | Triclinic                                                                     | triclinic                                                                      |
| Space group                                 | P-1                                                                           | P-1                                                                            |
| a/Å                                         | 9.8400(16)                                                                    | 9.824(2)                                                                       |
| b/Å                                         | 15.103(3)                                                                     | 15.246(4)                                                                      |
| c/Å                                         | 15.585(3)                                                                     | 16.151(4)                                                                      |
| α/°                                         | 65.375(5)                                                                     | 62.587(6)                                                                      |
| β/°                                         | 80.978(5)                                                                     | 81.046(7)                                                                      |
| γ/°                                         | 77.304(5)                                                                     | 78.095(7)                                                                      |
| Volume/Å <sup>3</sup>                       | 2048.4(6)                                                                     | 2096.2(9)                                                                      |
| Z                                           | 1                                                                             | 1                                                                              |
| ρ <sub>calc</sub> g/cm <sup>3</sup>         | 1.242                                                                         | 1.347                                                                          |
| μ/mm <sup>-1</sup>                          | 1.465                                                                         | 2.271                                                                          |
| F(000)                                      | 818.0                                                                         | 880.0                                                                          |
| 2θ range for data collection/°              | 4.732 to 52.742                                                               | 4.7 to 52.744                                                                  |
| Reflections collected                       | 61436                                                                         | 103495                                                                         |
| Independent reflections                     | 8384,<br>[R <sub>int</sub> = 0.1021]                                          | 8576,<br>[R <sub>int</sub> = 0.1070]                                           |
| Data/restraints/parameters                  | 8384/7/7448                                                                   | 8570/20/402                                                                    |
| Goodness-of-fit on F <sup>2</sup>           | 1.041                                                                         | 1.051                                                                          |
| Final R indexes [I ≥ 2σ (I)]                | R <sub>1</sub> = 0.0501,<br>wR <sub>2</sub> = 0.1231                          | R <sub>1</sub> = 0.0496,<br>wR <sub>2</sub> = 0.1146                           |
| Final R indexes [all data]                  | R <sub>1</sub> = 0.0665,<br>wR <sub>2</sub> = 0.1306                          | R <sub>1</sub> = 0.0639,<br>wR <sub>2</sub> = 0.1261                           |
| Largest diff. peak/hole / e Å <sup>-3</sup> | 1.26/-1.46                                                                    | 4.05/-1.62                                                                     |

---

**Table S4** Selected bond lengths [Å] and bond angles [deg] for complex 1

| <b>Bond lengths</b> |           |           |          |
|---------------------|-----------|-----------|----------|
| Y(1)-N(1)           | 2.562(3)  | Y(1)-O(1) | 2.115(4) |
| Y(1)-O(2)           | 2.137(2)  | Y(1)-O(3) | 2.385(2) |
| Y(1)-O(4')          | 2.250(2), | Y(1)-O(4) | 2.282(2) |
| O4-(Y1')            | 2.250(2); |           |          |

| <b>Bond Angles</b> |           |                 |            |
|--------------------|-----------|-----------------|------------|
| O(1)-Y(1)-N (1)    | 78.42(2)  | O(1)-Y(1)-O(3)  | 108.71(9)  |
| O(1)-Y(1)-O(4)     | 113.42(8) | O(1)-Y(1)-O(4') | 98.09(8)   |
| O(2)-Y(1)-N(1)     | 76.08(8)  | O(2)-Y(1)-O(1)  | 119.01(9)  |
| O(2)-Y(1)-O(3)     | 108.94(8) | O(2)-Y(1)-O(4)  | 124.67(8)  |
| O(2)-Y(1)-O(4')    | 87.66(8)  | O(3)-Y(1)-N(1)  | 65.28(8)   |
| O(4)-Y(1)-N(1)     | 132.57(8) | O(4')-Y(1)-N(1) | 158.61(8)  |
| O(4)-Y(1)-O(3)     | 67.50(7), | O(4')-Y(1)-O(3) | 134.54(7), |
| O(4')-Y(1)-O(4)    | 68.33(9)  | Y(1)-O(4)-Y(1') | 111.67(9)  |

**Table S5 Selected bond lengths [ $\text{\AA}$ ] and bond angles [deg] for complex 2**

| <b>Bond lengths</b> |          |            |          |
|---------------------|----------|------------|----------|
| Yb(1)-N(1)          | 2.524(5) | Yb(1)-O(1) | 2.115(4) |
| Yb(1)-O(2)          | 2.118(4) | Yb(1)-O(3) | 2.366(4) |
| Yb(1)-O(4')         | 2.217(4) | Yb(1)-O(4) | 2.251(4) |
| O4-(Yb1')           | 2.217(4) |            |          |

| <b>Bond Angles</b> |            |                   |             |
|--------------------|------------|-------------------|-------------|
| O(1)-Yb(1)-N(1)    | 76.98(15)  | O(1)-Yb(1)-O(3)   | 108.60(16)  |
| O(1)-Yb(1)-O(4)    | 125.68(15) | O(1)-Yb(1)-O(4')  | 87.36(15)   |
| O(2)-Yb(1)-N(1)    | 78.65(15)  | O(2)-Yb(1)-O(3)   | 110.01(16)  |
| O(2)-Yb(1)-O(1)    | 119.70(16) | O(2)-Yb(1)-O(4)   | 124.67(8)   |
| O(2)-Yb(1)-O(4')   | 96.94(15)  | O(3)-Yb(1)-N(1)   | 65.01(15)   |
| O(4)-Yb(1)-N(1)    | 133.51(15) | O(4')-Yb(1)-N(1)  | 158.47(15)  |
| O(4)-Yb(1)-O(3)    | 68.10(14), | O(4')-Yb(1)-O(3)  | 134.18(14), |
| O(4')-Yb(1)-O(4)   | 67.86(16)  | Yb(1)-O(4)-Yb(1') | 112.14(16)  |

**Table S6 Crystallographic data of complexes 3-4**

| complexes                                   | 3·tol·THF                                                                       | 4·2tol                                                                          |
|---------------------------------------------|---------------------------------------------------------------------------------|---------------------------------------------------------------------------------|
| Empirical formula                           | C <sub>87</sub> H <sub>136</sub> N <sub>2</sub> O <sub>11</sub> Nd <sub>2</sub> | C <sub>90</sub> H <sub>136</sub> N <sub>2</sub> O <sub>10</sub> La <sub>2</sub> |
| Formula weight                              | 1673.45                                                                         | 1683.83                                                                         |
| Temperature/K                               | 120.01                                                                          | 120.01                                                                          |
| Crystal system                              | Orthorhombic                                                                    | orthorhombic                                                                    |
| Space group                                 | Pbca                                                                            | Pbca                                                                            |
| a/Å                                         | 28.8956(15)                                                                     | 28.9251(15)                                                                     |
| b/Å                                         | 19.3068(8)                                                                      | 19.4673(10)                                                                     |
| c/Å                                         | 30.5515(15)                                                                     | 30.6233(16)                                                                     |
| α/°                                         | 90.00                                                                           | 90.00                                                                           |
| β/°                                         | 90.00                                                                           | 90.00                                                                           |
| γ/°                                         | 90.00                                                                           | 90.00                                                                           |
| Volume/Å <sup>3</sup>                       | 17044.1(14)                                                                     | 17243.8(15)                                                                     |
| Z                                           | 8                                                                               | 8                                                                               |
| ρ <sub>calc</sub> g/cm <sup>3</sup>         | 1.305                                                                           | 1.297                                                                           |
| μ/mm <sup>-1</sup>                          | 1.262                                                                           | 1.034                                                                           |
| F(000)                                      | 7040.0                                                                          | 7072.0                                                                          |
| 2θ range for data collection/°              | 4.4 to 55.00                                                                    | 4.184 to 52.744                                                                 |
| Reflections collected                       | 148607                                                                          | 221409                                                                          |
| Independent reflections                     | 19509<br>[R <sub>int</sub> = 0.0647]                                            | 17626<br>[R <sub>int</sub> = 0.0633]                                            |
| Data/restraints/parameters                  | 19509/299/990                                                                   | 17626/12/921                                                                    |
| Goodness-of-fit on F <sup>2</sup>           | 1.116                                                                           | 1.109                                                                           |
| Final R indexes [I ≥ 2σ (I)]                | R <sub>1</sub> = 0.0371,<br>wR <sub>2</sub> = 0.769                             | R <sub>1</sub> = 0.0375,<br>wR <sub>2</sub> = 0.0830                            |
| Final R indexes [all data]                  | R <sub>1</sub> = 0.0617<br>wR <sub>2</sub> = 0.0926                             | R <sub>1</sub> = 0.0465<br>wR <sub>2</sub> = 0.0867                             |
| Largest diff. peak/hole / e Å <sup>-3</sup> | 1.11/-1.10                                                                      | 1.69/-0.89                                                                      |

**Table S7 Selected bond lengths [Å] and bond angles [deg] for complex 3**

| <b>Bond lengths</b> |           |                  |           |
|---------------------|-----------|------------------|-----------|
| Nd(1)-O(1)          | 2.377(2)  | Nd(1)-O(2)       | 2.582(2)  |
| Nd(1)-O(3)          | 2.262(2)  | Nd(1)-O(4)       | 2.262(2)  |
| Nd(1)-O(5)          | 2.375(2)  | Nd(1)-O(9)       | 2.511(2)  |
| Nd(1)-N(1)          | 2.702(3)  | Nd(2)-O(1)       | 2.380(2)  |
| Nd(2)-O(5)          | 2.388(2)  | Nd(2)-O(6)       | 2.527(2)  |
| Nd(2)-O(7)          | 2.274(2)  | Nd(2)-O(8)       | 2.284(2)  |
| Nd(2)-O(10)         | 2.534(3)  | Nd(2)-N(2)       | 2.718(3)  |
| <b>Bond angles</b>  |           |                  |           |
| O(1)-Nd(1)-O(2)     | 66.82(7)  | O(1)-Nd(1)-O(9)  | 142.85(8) |
| O(1)-Nd(1)-N(1)     | 130.22(8) | O(2)-Nd(1)-N(1)  | 64.29(7)  |
| O(3)-Nd(1)-O(1)     | 90.00(8)  | O(3)-Nd(1)-O(2)  | 83.09(8)  |
| O(3)-Nd(1)-O(5)     | 116.72(8) | O(3)-Nd(1)-O(9)  | 77.36(8)  |
| O(3)-Nd(1)-N(1)     | 75.61(8)  | O(4)-Nd(1)-O(1)  | 119.60(8) |
| O(4)-Nd(1)-O(2)     | 93.65(8)  | O(4)-Nd(1)-O(3)  | 146.29(8) |
| O(4)-Nd(1)-O(5)     | 90.89(8)  | O(4)-Nd(1)-O(9)  | 86.03(8)  |
| O(4)-Nd(1)-N(1)     | 72.84(8)  | O(5)-Nd(1)-O(1)  | 68.13(8)  |
| O(5)-Nd(1)-O(2)     | 130.34(7) | O(5)-Nd(1)-O(9)  | 86.47(8)  |
| O(5)-Nd(1)-N(1)     | 159.79(8) | O(9)-Nd(1)-O(2)  | 143.16(7) |
| O(9)-Nd(1)-N(1)     | 80.64(8)  | O(1)-Nd(2)-O(5)  | 67.86(8)  |
| O(1)-Nd(2)-O(6)     | 120.31(8) | O(1)-Nd(2)-O(10) | 88.14(8)  |
| O(1)-Nd(2)-N(2)     | 160.85(8) | O(5)-Nd(2)-O(6)  | 68.28(8)  |
| O(5)-Nd(2)-O(10)    | 138.79(8) | O(5)-Nd(2)-N(2)  | 127.10(8) |
| O(6)-Nd(2)-O(10)    | 149.64(8) | O(6)-Nd(2)-N(2)  | 64.36(8)  |
| O(7)-Nd(2)-O(1)     | 87.45(8)  | O(7)-Nd(2)-O(5)  | 123.06(8) |
| O(7)-Nd(2)-O(6)     | 84.30(8)  | O(7)-Nd(2)-O(8)  | 145.54(8) |
| O(7)-Nd(2)-O(10)    | 86.84(9)  | O(7)-Nd(2)-N(2)  | 74.25(8)  |
| O(8)-Nd(2)-O(1)     | 123.01(8) | O(8)-Nd(2)-O(5)  | 86.37(8)  |
| O(8)-Nd(2)-O(6)     | 91.97(8)  | O(8)-Nd(2)-O(10) | 79.25(9)  |
| O(8)-Nd(2)-N(2)     | 73.71(8)  | O(10)-Nd(2)-N(2) | 85.29(9)  |
| Nd(1)-O(1)-Nd(2)    | 111.13(9) | Nd(1)-O(5)-Nd(2) | 110.95(9) |

**Table S8 Selected bond lengths [ $\text{\AA}$ ] and bond angles [deg] for complex 4**

| <b>Bond lengths</b> |           |                  |           |
|---------------------|-----------|------------------|-----------|
| La(1)-N(1)          | 2.766(3)  | La(1)-O(1)       | 2.300(2)  |
| La(1)-O(2)          | 2.318(2)  | La(1)-O(3)       | 2.644(2)  |
| La(1)-O(4)          | 2.424(2)  | La(1)-O(8)       | 2.422(2)  |
| La(1)-O(9)          | 2.611(2)  | La(2)-N(2)       | 2.779(3)  |
| La(2)-O(4)          | 2.435(2)  | La(2)-O(5)       | 2.337(2)  |
| La(2)-O(6)          | 2.314(2)  | La(2)-O(7)       | 2.592(2)  |
| La(2)-O(8)          | 2.438(2)  | La(2)-O(10)      | 2.595(3)  |
| <b>Bond angles</b>  |           |                  |           |
| O(1)-La(1)-N(1)     | 71.91(8)  | O(1)-La(1)-O(2)  | 144.23(8) |
| O(1)-La(1)-O(3)     | 92.83(8)  | O(1)-La(1)-O(4)  | 119.27(8) |
| O(1)-La(1)-O(8)     | 91.56(8)  | O(1)-La(1)-O(9)  | 85.96(8)  |
| O(2)-La(1)-N(1)     | 74.47(8)  | O(2)-La(1)-O(3)  | 82.47(8)  |
| O(2)-La(1)-O(4)     | 91.02(8)  | O(2)-La(1)-O(8)  | 118.60(8) |
| O(2)-La(1)-O(9)     | 77.22(8)  | O(3)-La(1)-N(1)  | 62.92(7)  |
| O(4)-La(1)-N(1)     | 127.67(8) | O(4)-La(1)-O(3)  | 64.58(7)  |
| O(4)-La(1)-O(9)     | 144.83(8) | O(8)-La(1)-N(1)  | 160.63(8) |
| O(8)-La(1)-O(3)     | 129.82(7) | O(8)-La(1)-O(4)  | 68.97(7)  |
| O(8)-La(1)-O(9)     | 87.60(8)  | O(9)-La(1)-N(1)  | 81.37(8)  |
| O(9)-La(1)-O(3)     | 142.57(7) | O(4)-La(2)-N(2)  | 161.25(8) |
| O(4)-La(2)-O(7)     | 119.97(8) | O(4)-La(2)-O(8)  | 68.51(7)  |
| O(4)-La(2)-O(10)    | 88.57(8)  | O(5)-La(2)-N(2)  | 72.43(8)  |
| O(5)-La(2)-O(4)     | 124.28(8) | O(5)-La(2)-O(7)  | 91.29(8)  |
| O(5)-La(2)-O(8)     | 87.23(8)  | O(5)-La(2)-O(10) | 79.03(9)  |
| O(6)-La(2)-N(2)     | 73.17(8)  | O(6)-La(2)-O(4)  | 88.51(8)  |
| O(6)-La(2)-O(5)     | 143.44(8) | O(6)-La(2)-O(7)  | 83.98(8)  |
| O(6)-La(2)-O(8)     | 123.06(8) | O(6)-La(2)-O(10) | 87.00(9)  |
| O(7)-La(2)-N(2)     | 63.11(8)  | O(7)-La(2)-O(10) | 149.68(8) |
| O(8)-La(2)-N(2)     | 124.86(8) | O(8)-La(2)-O(7)  | 66.90(8)  |
| O(8)-La(2)-O(10)    | 139.91(9) | O(10)-La(2)-N(2) | 86.57(9)  |
| La(1)-O(4)-La(2)    | 109.83(8) | La(1)-O(8)-La(2) | 109.81(8) |

**Table S9** Crystallographic data of complexes **5-6**

| complexes                                   | <b>5</b>                                                                           | <b>6</b>                                                                           |
|---------------------------------------------|------------------------------------------------------------------------------------|------------------------------------------------------------------------------------|
| Empirical formula                           | C <sub>80</sub> H <sub>126</sub> N <sub>2</sub> O <sub>14</sub> Sm <sub>2</sub> Zn | C <sub>80</sub> H <sub>126</sub> N <sub>2</sub> O <sub>14</sub> Nd <sub>2</sub> Zn |
| Formula weight                              | 1705.89                                                                            | 1693.67                                                                            |
| Temperature/K                               | 296(2)                                                                             | 293 (2)                                                                            |
| Crystal system                              | Triclinic                                                                          | Triclinic                                                                          |
| Space group                                 | P-1                                                                                | P-1                                                                                |
| a/Å                                         | 17.005(3)                                                                          | 17.271(8)                                                                          |
| b/Å                                         | 17.245(3)                                                                          | 17.417(8)                                                                          |
| c/Å                                         | 17.816(3)                                                                          | 17.976(8)                                                                          |
| α/°                                         | 108.783(4)                                                                         | 108.994(12)                                                                        |
| β/°                                         | 93.579(4)                                                                          | 93.290(14)                                                                         |
| γ/°                                         | 90.473(4)                                                                          | 90.941(14)                                                                         |
| Volume/Å <sup>3</sup>                       | 4934.5(15)                                                                         | 5101(4)                                                                            |
| Z                                           | 2                                                                                  | 2                                                                                  |
| ρ <sub>calc</sub> g/cm <sup>3</sup>         | 1.148                                                                              | 1.103                                                                              |
| μ/mm <sup>-1</sup>                          | 1.465                                                                              | 1.284                                                                              |
| F(000)                                      | 1772.0                                                                             | 1764.0                                                                             |
| 2θ range for data collection/°              | 4.538 to 51.362                                                                    | 4.492 to 51.362                                                                    |
| Reflections collected                       | 67549                                                                              | 105338                                                                             |
| Independent reflections                     | 18455<br>[R <sub>int</sub> = 0.2291]                                               | 19329<br>[R <sub>int</sub> = 0.1287]                                               |
| Data/restraints/parameters                  | 18455/1926/906                                                                     | 19329/1778/906                                                                     |
| Goodness-of-fit on F <sup>2</sup>           | 1.023                                                                              | 1.030                                                                              |
| Final R indexes [I>=2 σ (I)]                | R <sub>1</sub> = 0.1063,<br>wR <sub>2</sub> = 0.2735                               | R <sub>1</sub> = 0.1306,<br>wR <sub>2</sub> = 0.3237                               |
| Final R indexes [all data]                  | R <sub>1</sub> = 0.2220<br>wR <sub>2</sub> = 0.3316                                | R <sub>1</sub> = 0.2021<br>wR <sub>2</sub> = 0.3946                                |
| Largest diff. peak/hole / e Å <sup>-3</sup> | 1.43/-1.72                                                                         | 4.62/-1.89                                                                         |

**Table S10** Selected bond lengths [Å] and bond angles [deg] for complex **5**

---

---

**Bond lengths**

---

|             |           |             |           |
|-------------|-----------|-------------|-----------|
| Sm(1)-O(1)  | 2.541(11) | Sm(2)-O(11) | 2.529(10) |
| Sm(1)-O(2)  | 2.175(11) | Sm(2)-O(12) | 2.180(11) |
| Sm(1)-O(3)  | 2.559(10) | Sm(2)-O(13) | 2.535(9)  |
| Sm(1)-O(4)  | 2.185(10) | Sm(2)-O(14) | 2.163(11) |
| Sm(1)-O(5)  | 2.339(9)  | Sm(2)-N(2)  | 2.605(14) |
| Sm(1)-O(6)  | 2.348(11) | Zn(1)-O(5)  | 1.933(9)  |
| Sm(1)-N(1)  | 2.673(11) | Zn(1)-O(7)  | 1.945(11) |
| Sm(2)-O(9)  | 2.358(11) | Zn(1)-O(8)  | 1.924(12) |
| Sm(2)-O(10) | 2.335(9)  | Zn(1)-O(10) | 1.940(10) |

---

**Bond angles**

---

|                 |          |                   |          |
|-----------------|----------|-------------------|----------|
| O(1)-Sm(1)-O(3) | 141.3(3) | O(10)-Sm(2)-O(11) | 66.5(4)  |
| O(1)-Sm(1)-O(1) | 79.2 (3) | O(10)-Sm(2)-O(13) | 150.5(4) |
| O(2)-Sm(1)-O(1) | 82.4(4)  | O(10)-Sm(2)-N(2)  | 131.1(4) |
| O(2)-Sm(1)-O(3) | 91.1(3)  | O(11)-Sm(2)-O(13) | 143.0(3) |
| O(2)-Sm(1)-O(4) | 149.0(4) | O(11)-Sm(2)-N(2)  | 64.6(4)  |
| O(2)-Sm(1)-O(5) | 103.1(3) | O(12)-Sm(2)-O(9)  | 101.1(4) |
| O(2)-Sm(1)-O(6) | 98.3(4)  | O(12)-Sm(2)-O(10) | 101.5(4) |
| O(2)-Sm(1)-N(1) | 72.4(3)  | O(12)-Sm(2)-O(11) | 87.5(4)  |
| O(3)-Sm(1)-N(1) | 65.1(3)  | O(12)-Sm(2)-O(13) | 83.6(4)  |
| O(4)-Sm(1)-O(1) | 81.9(4)  | O(12)-Sm(2)-N(2)  | 76.2(5)  |
| O(4)-Sm(1)-O(3) | 86.2(3)  | O(13)-Sm(2)-N(2)  | 78.4(4)  |
| O(4)-Sm(1)-O(5) | 103.8(4) | O(14)-Sm(2)-O(9)  | 100.6(4) |
| O(4)-Sm(1)-O(6) | 102.4(4) | O(14)-Sm(2)-O(10) | 102.3(4) |
| O(4)-Sm(1)-N(1) | 76.7(3)  | O(14)-Sm(2)-O(11) | 86.1(4)  |
| O(5)-Sm(1)-O(1) | 150.3(3) | O(14)-Sm(2)-O(12) | 150.5(4) |
| O(5)-Sm(1)-O(3) | 65.6(3)  | O(14)-Sm(2)-O(13) | 84.3(3)  |
| O(5)-Sm(1)-O(6) | 77.1(3)  | O(14)-Sm(2)-N(2)  | 75.1(4)  |



|                  |          |                   |          |
|------------------|----------|-------------------|----------|
| O(5)-Sm(1)-N(1)  | 130.5(3) | O(5)-Zn(1)-O(7)   | 113.0(4) |
| O(6)-Sm(1)-O(1)  | 73.2(4)  | O(5)-Zn(1)-O(10)  | 109.2(4) |
| O(6)-Sm(1)-O(3)  | 142.7(3) | O(8)-Zn(1)-O(5)   | 106.1(5) |
| O(6)-Sm(1)-N(1)  | 152.2(4) | O(8)-Zn(1)-O(7)   | 109.4(5) |
| O(9)-Sm(2)-O(11) | 144.8(4) | O(8)-Zn(1)-O(10)  | 113.1(4) |
| O(9)-Sm(2)-O(13) | 72.2(3)  | O(10)-Zn(1)-O(7)  | 106.2(5) |
| O(9)-Sm(2)-N(2)  | 150.6(4) | Zn(1)-O(5)-Sm(1)  | 125.2(5) |
| O(10)-Sm(2)-O(9) | 78.4(3)  | Zn(1)-O(10)-Sm(2) | 123.9(5) |

**Table S11** Selected bond lengths [ $\text{\AA}$ ] and bond angles [deg] for complex **6**

| <b>Bond lengths</b> |           |                   |           |
|---------------------|-----------|-------------------|-----------|
| Nd(1)-O(1)          | 2.569(10) | Nd(2)-O(11)       | 2.222(11) |
| Nd(1)-O(2)          | 2.236(12) | Nd(2)-O(12)       | 2.609(11) |
| Nd(1)-O(3)          | 2.570(10) | Nd(2)-O(13)       | 2.251(11) |
| Nd(1)-O(4)          | 2.213(13) | Nd(2)-O(14)       | 2.591(13) |
| Nd(1)-O(5)          | 2.348(11) | Nd(2)-N(2)        | 2.715(12) |
| Nd(1)-O(6)          | 2.414(13) | Zn(1)-O(5)        | 1.945(13) |
| Nd(1)-N(1)          | 2.683(14) | Zn(1)-O(7)        | 1.940(13) |
| Nd(2)-O(9)          | 2.407(13) | Zn(1)-O(8)        | 1.988(14) |
| Nd(2)-O(10)         | 2.399(12) | Zn(1)-O(10)       | 1.931(11) |
| <b>Bond angles</b>  |           |                   |           |
| O(1)-Nd(1)-O(3)     | 144.0(4)  | O(10)-Nd(2)-O(12) | 65.1(4)   |
| O(1)-Nd(1)-O(1)     | 79.7 (4)  | O(10)-Nd(2)-O(14) | 151.4(4)  |
| O(2)-Nd(1)-O(1)     | 83.5(4)   | O(10)-Nd(2)-N(2)  | 128.4(4)  |
| O(2)-Nd(1)-O(3)     | 87.7(4)   | O(11)-Nd(2)-O(9)  | 98.7(5)   |
| O(2)-Nd(1)-O(5)     | 102.2(4)  | O(11)-Nd(2)-O(10) | 104.0(4)  |
| O(2)-Nd(1)-O(6)     | 101.2(5)  | O(11)-Nd(2)-O(12) | 91.3(4)   |
| O(2)-Nd(1)-N(1)     | 75.8(5)   | O(11)-Nd(2)-O(13) | 146.7(4)  |
| O(3)-Nd(1)-N(1)     | 64.3(4)   | O(11)-Nd(2)-O(14) | 73.5(4)   |

|                  |          |                   |          |
|------------------|----------|-------------------|----------|
| O(4)-Nd(1)-O(1)  | 83.8(4)  | O(11)-Nd(2)-N(2)  | 83.13(4) |
| O(4)-Nd(1)-O(2)  | 148.7(5) | O(12)-Nd(2)-N(2)  | 63.5(4)  |
| O(4)-Nd(1)-O(3)  | 86.0(4)  | O(13)-Nd(2)-O(9)  | 103.4(4) |
| O(4)-Nd(1)-O(5)  | 103.3(4) | O(13)-Nd(2)-O(10) | 104.6(4) |
| O(4)-Nd(1)-O(6)  | 101.6(4) | O(13)-Nd(2)-O(12) | 85.5(4)  |
| O(4)-Nd(1)-N(1)  | 73.9(5)  | O(13)-Nd(2)-O(14) | 80.6(4)  |
| O(5)-Nd(1)-O(1)  | 149.4(4) | O(13)-Nd(2)-N(2)  | 75.4(4)  |
| O(5)-Nd(1)-O(3)  | 66.6(4)  | O(14)-Nd(2)-O(12) | 143.3(4) |
| O(5)-Nd(1)-O(6)  | 78.0(4)  | O(14)-Nd(2)-N(2)  | 80.1(4)  |
| O(5)-Nd(1)-N(1)  | 130.9(4) | O(5)-Zn(1)-O(8)   | 104.5(6) |
| O(6)-Nd(1)-O(1)  | 71.4(4)  | O(7)-Zn(1)-O(5)   | 114.1(5) |
| O(6)-Nd(1)-O(3)  | 144.6(4) | O(7)-Zn(1)-O(8)   | 110.2(6) |
| O(6)-Nd(1)-N(1)  | 151.1(4) | O(10)-Zn(1)-O(5)  | 109.9(5) |
| O(9)-Nd(2)-O(12) | 143.8(4) | O(10)-Zn(1)-O(7)  | 103.5(5) |
| O(9)-Nd(2)-O(14) | 72.8(4)  | O(10)-Zn(1)-N(8)  | 115.0(5) |
| O(9)-Nd(2)-N(2)  | 152.6(4) | Zn(1)-O(5)-Nd(1)  | 125.5(5) |
| O(10)-Nd(2)-O(9) | 78.7(4)  | Zn(1)-O(10)-Nd(2) | 124.0(6) |

**Table S12** Crystallographic data of complexes **7-8**

| complexes         | <b>7</b> ·4THF                                                                     | <b>8</b> ·2THF·hex                                                                  |
|-------------------|------------------------------------------------------------------------------------|-------------------------------------------------------------------------------------|
| Empirical formula | C <sub>106</sub> H <sub>166</sub> N <sub>2</sub> O <sub>16</sub> Y <sub>2</sub> Zn | C <sub>104</sub> H <sub>164</sub> N <sub>2</sub> O <sub>14</sub> Yb <sub>2</sub> Zn |
| Formula weight    | 1967.59                                                                            | 2077.81                                                                             |
| Temperature/K     | 120(2)                                                                             | 296.15(2)                                                                           |
| Crystal system    | Triclinic                                                                          | triclinic                                                                           |
| Space group       | P-1                                                                                | P-1                                                                                 |
| a/Å               | 15.3715(19)                                                                        | 13.7365(7)                                                                          |
| b/Å               | 18.856(2)                                                                          | 18.4813(9)                                                                          |
| c/Å               | 19.968(3)                                                                          | 23.8894(11)                                                                         |

|                                                |                                        |                                        |
|------------------------------------------------|----------------------------------------|----------------------------------------|
| $\alpha/^\circ$                                | 96.829(4)                              | 111.217(2)                             |
| $\beta/^\circ$                                 | 97.583(4)                              | 97.959(2)                              |
| $\gamma/^\circ$                                | 111.939(4)                             | 102.216(2)                             |
| Volume/ $\text{\AA}^3$                         | 5231.6(12)                             | 5369.5(5)                              |
| Z                                              | 2                                      | 2                                      |
| $\rho_{\text{calc}} \text{ g/cm}^3$            | 1.249                                  | 1.285                                  |
| $\mu/\text{mm}^{-1}$                           | 1.389                                  | 2.006                                  |
| F(000)                                         | 2104.0                                 | 2168.0                                 |
| 2 $\theta$ range for data collection/ $^\circ$ | 4.416 to 52.744                        | 4.512 to 52.744                        |
| Reflections collected                          | 184194                                 | 293922                                 |
| Independent reflections                        | 21369<br>[ $R_{\text{int}} = 0.1265$ ] | 21942<br>[ $R_{\text{int}} = 0.0645$ ] |
| Data/restraints/parameters                     | 21369/134/1028                         | 21942/2073/1069                        |
| Goodness-of-fit on $F^2$                       | 1.036                                  | 1.063                                  |
| Final R indexes [ $I \geq 2 \sigma(I)$ ]       | $R_1 = 0.0514$ ,<br>$wR_2 = 0.1237$    | $R_1 = 0.0326$ ,<br>$wR_2 = 0.0797$    |
| Final R indexes [all data]                     | $R_1 = 0.0892$<br>$wR_2 = 0.1386$      | $R_1 = 0.0455$<br>$wR_2 = 0.0882$      |
| Largest diff. peak/hole / $e \text{ \AA}^{-3}$ | 0.52/-0.64                             | 1.74/-1.73                             |

**Table S13** Selected bond lengths [ $\text{\AA}$ ] and bond angles [deg] for complex **7**

| <b>Bond lengths</b> |           |            |          |
|---------------------|-----------|------------|----------|
| Y(1)-O(1)           | 2.132(2)  | Zn(1)-O(8) | 1.925(2) |
| Y(1)-O(2)           | 2.502(2)  | Y(2)-O(7)  | 2.301(2) |
| Y(1)-O(3)           | 2.141(2)  | Y(2)-O(8)  | 2.278(2) |
| Y(1)-O(4)           | 2.462(2), | Y(2)-O(9)  | 2.158(2) |
| Y(1)-O(5)           | 2.296(2)  | Y(2)-O(10) | 2.508(2) |
| Y(1)-O(6)           | 2.277(2)  | Y(2)-O(11) | 2.142(2) |
| Zn(1)-O(5)          | 1.961(2)  | Y(2)-O(12) | 2.476(2) |
| Zn(1)-O(6)          | 1.929(2)  | Y(1)-N(1)  | 2.644(3) |
| Zn(1)-O(7)          | 2.301(2)  | Y(2)-N(2)  | 2.624(3) |

**Bond angles**

---

|                 |           |                  |            |
|-----------------|-----------|------------------|------------|
| O(1)-Y(1)-O(2)  | 85.34(9)  | O(8)-Y(2)-O(10)  | 65.31(7)   |
| O(1)-Y(1)-O(3)  | 150.86(9) | O(8)-Y(2)-O(12)  | 148.16(8)  |
| O(1)-Y(1)-O(4)  | 81.99(9)  | O(9)-Y(2)-N(2)   | 78.25(8)   |
| O(1)-Y(1)-O(5)  | 104.64(8) | O(9)-Y(2)-O(7)   | 102.16(8)  |
| O(1)-Y(1)-O(6)  | 102.03(9) | O(9)-Y(2)-O(8)   | 104.09(8)  |
| O(1)-Y(1)-N(1)  | 75.46(9)  | O(9)-Y(2)-O(10)  | 88.29(8)   |
| O(2)-Y(1)-N(1)  | 65.46(8)  | O(9)-Y(2)-O(12)  | 80.95(8)   |
| O(3)-Y(1)-N(1)  | 76.74(8)  | O(10)-Y(2)-N(2)  | 64.75(7)   |
| O(3)-Y(1)-O(2)  | 91.01(8)  | O(11)-Y(2)-N(2)  | 75.64(8)   |
| O(3)-Y(1)-O(4)  | 85.34(9)  | O(11)-Y(2)-O(7)  | 98.73(8)   |
| O(3)-Y(1)-O(5)  | 98.49(8)  | O(11)-Y(2)-O(8)  | 101.99(8)  |
| O(3)-Y(1)-O(6)  | 102.68(8) | O(11)-Y(2)-O(9)  | 151.15(8)  |
| O(4)-Y(1)-N(1)  | 81.23(8)  | O(11)-Y(2)-O(10) | 91.52(8)   |
| O(4)-Y(1)-O(2)  | 146.40(8) | O(11)-Y(2)-O(12) | 83.43(8)   |
| O(5)-Y(1)-N(1)  | 159.96(8) | O(12)-Y(2)-N(2)  | 81.93(8)   |
| O(5)-Y(1)-O(2)  | 134.50(8) | O(12)-Y(2)-O(10) | 146.46(7)  |
| O(5)-Y(1)-O(4)  | 78.97(8)  | O(6)-Zn(1)-O(5)  | 83.41 (9)  |
| O(6)-Y(1)-N(1)  | 131.00(8) | O(6)-Zn(1)-O(7)  | 115.28(9)  |
| O(6)-Y(1)-O(2)  | 65.56(8)  | O(7)-Zn(1)-O(5)  | 136.68(10) |
| O(6)-Y(1)-O(4)  | 147.68(8) | O(8)-Zn(1)-O(5)  | 112.20(9)  |
| O(6)-Y(1)-O(5)  | 68.94(8)  | O(8)-Zn(1)-O(6)  | 134.55(10) |
| O(7)-Y(2)-N(2)  | 161.39(8) | O(8)-Zn(1)-O(7)  | 83.05(9)   |
| O(7)-Y(2)-O(10) | 133.69(7) | Zn(1)-O(5)-Y(1)  | 102.91(9)  |
| O(7)-Y(2)-O(12) | 79.79(7)  | Zn(1)-O(6)-Y(1)  | 104.63(10) |
| O(8)-Y(2)-N(2)  | 129.89(8) | Zn(1)-O(7)-Y(2)  | 103.29(9)  |
| O(8)-Y(2)-O(7)  | 68.39(8)  | Zn(1)-O(8)-Y(2)  | 105.18(16) |

---

**Table S14** Selected bond lengths [ $\text{\AA}$ ] and bond angles [deg] for complex **8**

---

---

**Bond lengths**

---

|             |          |             |          |
|-------------|----------|-------------|----------|
| Zn(1)-O(5)  | 1.928(3) | Yb(1)-O(4)  | 2.474(3) |
| Zn(1)-O(10) | 1.931(3) | Yb(1)-N(1)  | 2.595(3) |
| Zn(1)-O(1)  | 1.953(3) | Yb(2)-O(8)  | 2.110(3) |
| Zn(1)-O(6)  | 1.958(3) | Yb(2)-O(7)  | 2.127(3) |
| Yb(1)-O(3)  | 2.112(3) | Yb(2)-O(10) | 2.233(3) |
| Yb(1)-O(2)  | 2.127(3) | Yb(2)-O(6)  | 2.277(3) |
| Yb(1)-O(5)  | 2.233(3) | Yb(2)-O(12) | 2.454(3) |
| Yb(1)-O(1)  | 2.269(3) | Yb(2)-O(9)  | 2.465(3) |
| Yb(1)-O(11) | 2.466(3) | Yb(2)-N(2)  | 2.593(3) |

---

**Bond angles**

---

|                  |            |                   |            |
|------------------|------------|-------------------|------------|
| O(5)-Zn(1)-O(10) | 133.65(12) | O(4)-Yb(1)-N(1)   | 65.26(10)  |
| O(5)-Zn(1)-O(1)  | 81.73(11)  | O(8)-Yb(2)-O(7)   | 153.42(10) |
| O(1)-Zn(1)-O(1)  | 114.57(11) | O(8)-Yb(2)-O(10)  | 99.51(10)  |
| O(5)-Zn(1)-O(6)  | 114.88(12) | O(7)-Yb(2)-O(10)  | 104.04(11) |
| O(10)-Zn(1)-O(6) | 82.10(11)  | O(8)-Yb(2)-O(6)   | 100.14(10) |
| O(1)-Zn(1)-O(6)  | 138.69(12) | O(7)-Yb(2)-O(6)   | 99.67(10)  |
| O(3)-Yb(1)-O(2)  | 153.18(10) | O(10)-Yb(2)-O(6)  | 68.97(9)   |
| O(3)-Yb(1)-O(5)  | 99.32(11)  | O(8)-Yb(2)-O(12)  | 82.86(10)  |
| O(2)-Yb(1)-O(5)  | 104.57(11) | O(7)-Yb(2)-O(12)  | 83.67(11)  |
| O(3)-Yb(1)-O(1)  | 105.48(10) | O(10)-Yb(2)-O(12) | 147.95(10) |
| O(2)-Yb(1)-O(1)  | 94.55(10)  | O(6)-Yb(2)-O(12)  | 79.11(10)  |
| O(5)-Yb(1)-O(1)  | 68.66(9)   | O(8)-Yb(2)-O(9)   | 91.09(10)  |
| O(3)-Yb(1)-O(11) | 82.12(11)  | O(7)-Yb(2)-O(9)   | 87.39(10)  |
| O(2)-Yb(1)-O(11) | 84.26(11)  | O(10)-Yb(2)-O(9)  | 66.04(9)   |
| O(5)-Yb(1)-O(11) | 147.40(10) | O(6)-Yb(2)-O(9)   | 134.83(9)  |
| O(1)-Yb(1)-O(11) | 79.51(10)  | O(12)-Yb(2)-O(9)  | 145.99(9)  |
| O(3)-Yb(1)-O(4)  | 89.51(11)  | O(8)-Yb(2)-N(2)   | 76.90(10)  |

|                  |            |                   |            |
|------------------|------------|-------------------|------------|
| O(2)-Yb(1)-O(4)  | 89.34(11)  | O(7)-Yb(2)-N(2)   | 78.40(10)  |
| O(5)-Yb(1)-O(4)  | 65.67(9)   | O(10)-Yb(2)-N(2)  | 131.03(10) |
| O(1)-Yb(1)-O(4)  | 133.62(9)  | O(6)-Yb(2)-N(2)   | 159.94(10) |
| O(11)-Yb(1)-O(4) | 146.74(10) | O(12)-Yb(2)-N(2)  | 80.83(10)  |
| O(3)-Yb(1)-N(1)  | 77.16(10)  | O(9)-Yb(2)-N(2)   | 65.23(9)   |
| O(2)-Yb(1)-N(1)  | 78.05(10)  | Zn(1)-O(1)-Yb(1)  | 103.71(11) |
| O(5)-Yb(1)-N(1)  | 130.82(10) | Zn(1)-O(5)-Yb(1)  | 105.90(11) |
| O(1)-Yb(1)-N(1)  | 160.22(10) | Zn(1)-O(6)-Yb(2)  | 103.06(11) |
| O(11)-Yb(1)-N(1) | 81.49(10)  | Zn(1)-O(10)-Yb(2) | 105.60(11) |

**Table S15** Crystallographic data of complexes **9-11**

| complexes                           | <b>9</b> ·4THF                                                                      | <b>10</b> ·4THF                                                                    | <b>11</b> ·4THF                                                                     |
|-------------------------------------|-------------------------------------------------------------------------------------|------------------------------------------------------------------------------------|-------------------------------------------------------------------------------------|
| Empirical formula                   | C <sub>154</sub> H <sub>262</sub> N <sub>2</sub> O <sub>28</sub> Sm <sub>2</sub> Zn | C <sub>94</sub> H <sub>142</sub> N <sub>2</sub> O <sub>13</sub> Nd <sub>2</sub> Zn | C <sub>106</sub> H <sub>166</sub> N <sub>2</sub> O <sub>16</sub> La <sub>2</sub> Zn |
| Formula weight                      | 2955.71                                                                             | 1854.79                                                                            | 2067.59                                                                             |
| Temperature/K                       | 120(2)                                                                              | 296(2)                                                                             | 296(2)                                                                              |
| Crystal system                      | Triclinic                                                                           | Triclinic                                                                          | Triclinic                                                                           |
| Space group                         | P-1                                                                                 | P-1                                                                                | P-1                                                                                 |
| a/Å                                 | 15.4179(6)                                                                          | 15.5910(8)                                                                         | 15.652(2)                                                                           |
| b/Å                                 | 19.0726(8)                                                                          | 19.2543(10)                                                                        | 19.351(3)                                                                           |
| c/Å                                 | 19.8412(8)                                                                          | 20.0408(10)                                                                        | 20.081(3)                                                                           |
| α/°                                 | 96.9020(10)                                                                         | 96.615(2)                                                                          | 96.633(4)                                                                           |
| β/°                                 | 97.1110(10)                                                                         | 97.694(2)                                                                          | 97.800(4)                                                                           |
| γ/°                                 | 111.8820(10)                                                                        | 111.723(2)                                                                         | 111.422(4)                                                                          |
| Volume/Å <sup>3</sup>               | 5284.1(4)                                                                           | 5449.2(5)                                                                          | 5519.1(12)                                                                          |
| Z                                   | 2                                                                                   | 2                                                                                  | 2                                                                                   |
| ρ <sub>calc</sub> g/cm <sup>3</sup> | 1.858                                                                               | 1.130                                                                              | 1.244                                                                               |
| μ/mm <sup>-1</sup>                  | 1.421                                                                               | 1.207                                                                              | 1.034                                                                               |
| F(000)                              | 3150.0                                                                              | 974.0                                                                              | 2176.0                                                                              |
| 2θ range for data collection/°      | 4.206 to 55.038                                                                     | 4.4 to 52.12                                                                       | 4.568 to 55.044                                                                     |

|                                             |                                                      |                                                      |                                                      |
|---------------------------------------------|------------------------------------------------------|------------------------------------------------------|------------------------------------------------------|
| Reflections collected                       | 109255                                               | 314402                                               | 317522                                               |
| Independent reflections                     | 24239<br>[R <sub>int</sub> = 0.0707]                 | 25095<br>[R <sub>int</sub> = 0.0692]                 | 25376<br>[R <sub>int</sub> = 0.0786]                 |
| Data/restraints/parameters                  | 24239/26/998                                         | 25095/66/1032                                        | 25376/261/1247                                       |
| Goodness-of-fit on F <sup>2</sup>           | 1.017                                                | 1.094                                                | 1.045                                                |
| Final R indexes [I ≥ 2 σ (I)]               | R <sub>1</sub> = 0.0391,<br>wR <sub>2</sub> = 0.0999 | R <sub>1</sub> = 0.0565,<br>wR <sub>2</sub> = 0.1900 | R <sub>1</sub> = 0.0408,<br>wR <sub>2</sub> = 0.0925 |
| Final R indexes [all data]                  | R <sub>1</sub> = 0.0574,<br>wR <sub>2</sub> = 0.1136 | R <sub>1</sub> = 0.0815<br>wR <sub>2</sub> = 0.2112  | R <sub>1</sub> = 0.0681<br>wR <sub>2</sub> = 0.1039  |
| Largest diff. peak/hole / e Å <sup>-3</sup> | 1.97/-0.85                                           | 2.51/-1.67                                           | 0.94/-0.79                                           |

**Table S16** Selected bond lengths [Å] and bond angles [deg] for complex **9**

**Bond lengths**

|             |           |             |          |
|-------------|-----------|-------------|----------|
| Sm(1)-Zn(1) | 3.3888(4) | Sm(2)-O(8)  | 2.355(2) |
| Sm(1)-O(1)  | 2.538(2)  | Sm(2)-O(9)  | 2.563(2) |
| Sm(1)-O(2)  | 2.197(2)  | Sm(2)-O(10) | 2.192(2) |
| Sm(1)-O(3)  | 2.563(2)  | Sm(2)-O(11) | 2.203(2) |
| Sm(1)-O(4)  | 2.216(2)  | Sm(2)-O(12) | 2.536(3) |
| Sm(1)-O(5)  | 2.335(2)  | Sm(2)-N(2)  | 2.691(3) |
| Sm(1)-O(6)  | 2.353(2)  | Zn(1)-O(5)  | 1.931(2) |
| Sm(1)-N(1)  | 2.675(3)  | Zn(1)-O(6)  | 1.950(2) |
| Sm(2)-Zn(1) | 3.3784(4) | Zn(1)-O(7)  | 1.932(2) |
| Sm(2)-O(7)  | 2.334(2)  | Zn(1)-O(8)  | 1.959(2) |

**Bond angles**

|                 |           |                  |            |
|-----------------|-----------|------------------|------------|
| O(2)-Sm(1)-O(3) | 90.47(8)  | O(8)-Sm(2)-O(10) | 147.95(11) |
| O(2)-Sm(1)-O(4) | 148.47(9) | O(8)-Sm(2)-N(11) | 128.91(12) |
| O(2)-Sm(1)-O(5) | 102.68(9) | O(9)-Sm(2)-O(7)  | 99.30(12)  |
| O(2)-Sm(1)-O(6) | 98.79(9)  | O(9)-Sm(2)-O(8)  | 103.00(12) |
| O(3)-Sm(1)-N(1) | 64.11(8)  | O(10)-Sm(2)-O(7) | 104.19(9)  |
| O(4)-Sm(1)-N(1) | 76.58(8)  | O(10)-Sm(2)-O(8) | 106.41(9)  |

|                  |           |                   |            |
|------------------|-----------|-------------------|------------|
| O(4)-Sm(1)-O(1)  | 80.46(8)  | O(10)-Sm(2)-O(9)  | 84.83(9)   |
| O(4)-Sm(1)-O(3)  | 88.76(8)  | O(10)-Sm(2)-O(11) | 147.99(9)  |
| O(4)-Sm(1)-O(5)  | 105.28(9) | O(10)-Sm(2)-O(12) | 81.83(9)   |
| O(4)-Sm(1)-O(6)  | 105.15(9) | O(11)-Sm(2)-N(2)  | 75.70(9)   |
| O(5)-Sm(1)-N(1)  | 128.25(8) | O(11)-Sm(2)-O(7)  | 102.94(9)  |
| O(5)-Sm(1)-O(1)  | 148.19(8) | O(11)-Sm(2)-O(8)  | 99.25(9)   |
| O(5)-Sm(1)-O(3)  | 64.24(8)  | O(11)-Sm(2)-O(9)  | 91.75(9)   |
| O(5)-Sm(1)-O(6)  | 67.42(8)  | O(11)-Sm(2)-O(12) | 84.22(9)   |
| O(6)-Sm(1)-N(1)  | 163.73(8) | O(12)-Sm(2)-N(2)  | 83.09(9)   |
| O(6)-Sm(1)-O(1)  | 80.83(8)  | O(12)-Sm(2)-O(9)  | 147.29(8)  |
| O(6)-Sm(1)-O(3)  | 131.64(8) | O(5)-Zn(1)-O(6)   | 84.20(10)  |
| O(7)-Sm(2)-N(2)  | 129.04(9) | O(5)-Zn(1)-O(7)   | 111.74(10) |
| O(7)-Sm(2)-O(8)  | 68.07(8)  | O(5)-Zn(1)-O(8)   | 136.15(14) |
| O(7)-Sm(2)-O(9)  | 64.60(8)  | O(6)-Zn(1)-O(8)   | 134.63(10) |
| O(7)-Sm(2)-O(12) | 147.87(9) | O(7)-Zn(1)-O(6)   | 113.45(10) |
| O(8)-Sm(2)-O(9)  | 132.66(8) | O(7)-Zn(1)-O(8)   | 84.81(10)  |
| O(8)-Sm(2)-O(12) | 79.91(8)  | Zn(1)-O(5)-Sm(1)  | 104.78(10) |
| O(8)-Sm(2)-N(2)  | 162.69(9) | Zn(1)-O(6)-Sm(1)  | 103.54(10) |
| O(9)-Sm(2)-N(2)  | 64.54(8)  | Zn(1)-O(7)-Sm(2)  | 104.34(10) |
| O(10)-Sm(2)-N(2) | 74.13(9)  | Zn(1)-O(8)-Sm(2)  | 102.71(10) |

**Table S17** Selected bond lengths [ $\text{\AA}$ ] and bond angles [deg] for complex **10**

| <b>Bond lengths</b> |           |             |          |
|---------------------|-----------|-------------|----------|
| Nd(1)-Zn(1)         | 3.3995(4) | Nd(2)-O(8)  | 2.223(2) |
| Nd(1)-O(1)          | 2.389(2)  | Nd(2)-O(9)  | 2.240(2) |
| Nd(1)-O(2)          | 2.217(2)  | Nd(2)-O(10) | 2.597(2) |
| Nd(1)-O(3)          | 2.221(2)  | Nd(2)-O(11) | 2.369(2) |
| Nd(1)-O(4)          | 2.587(2)  | Nd(2)-O(12) | 2.573(2) |
| Nd(1)-O(5)          | 2.367(2)  | Nd(2)-N(2)  | 2.713(2) |



---

|             |           |             |          |
|-------------|-----------|-------------|----------|
| Nd(1)-O(6)  | 2.566(2)  | Zn(1)-O(1)  | 1.958(2) |
| Nd(1)-N(1)  | 2.722(3)  | Zn(1)-O(5)  | 1.932(2) |
| Nd(2)-Zn(1) | 3.4122(4) | Zn(1)-O(7)  | 1.954(2) |
| Nd(2)-O(7)  | 2.384(2)  | Zn(1)-O(11) | 1.933(2) |

---

**Bond angles**

---

|                  |           |                   |            |
|------------------|-----------|-------------------|------------|
| O(1)-Nd(1)-O(4)  | 131.63(7) | O(8)-Nd(2)-O(10)  | 90.26(8)   |
| O(1)-Nd(1)-O(6)  | 80.10(8)  | O(8)-Nd(2)-O(11)  | 103.02(8)  |
| O(1)-Nd(1)-N(1)  | 164.16(8) | O(8)-Nd(2)-O(12)  | 82.09(8)   |
| O(2)-Nd(1)-O(1)  | 106.79(8) | O(8)-Nd(2)-N(2)   | 74.04(8)   |
| O(2)-Nd(1)-O(3)  | 146.99(9) | O(9)-Nd(2)-O(7)   | 105.52(8)  |
| O(2)-Nd(1)-O(4)  | 84.73(9)  | O(9)-Nd(2)-O(10)  | 89.41(8)   |
| O(2)-Nd(1)-O(5)  | 104.41(9) | O(9)-Nd(2)-O(11)  | 106.78(8)  |
| O(2)-Nd(1)-O(6)  | 82.24(9)  | O(9)-Nd(2)-O(12)  | 80.59(8)   |
| O(2)-Nd(1)-N(1)  | 73.67(8)  | O(9)-Nd(2)-N(2)   | 75.84(8)   |
| O(3)-Nd(1)-O(1)  | 100.78(8) | O(10)-Nd(2)-N(2)  | 63.48(7)   |
| O(3)-Nd(1)-O(4)  | 90.41(8)  | O(11)-Nd(2)-O(7)  | 67.11(7)   |
| O(3)-Nd(1)-O(5)  | 102.62(9) | O(11)-Nd(2)-O(10) | 63.47(7)   |
| O(3)-Nd(1)-O(6)  | 85.01(9)  | O(11)-Nd(2)-O(12) | 148.55(8)  |
| O(3)-Nd(1)-N(1)  | 74.86(8)  | O(11)-Nd(2)-N(2)  | 126.83(7)  |
| O(4)-Nd(1)-N(1)  | 64.11(8)  | O(12)-Nd(2)-O(10) | 147.98(7)  |
| O(5)-Nd(1)-O(1)  | 67.64(8)  | O(12)-Nd(2)-N(2)  | 84.55(8)   |
| O(5)-Nd(1)-O(4)  | 63.99(7)  | O(5)-Zn(1)-O(1)   | 85.78(9)   |
| O(5)-Nd(1)-O(6)  | 147.67(8) | O(5)-Zn(1)-O(7)   | 112.91(10) |
| O(5)-Nd(1)-N(1)  | 128.01(8) | O(5)-Zn(1)-O(11)  | 135.61(10) |
| O(6)-Nd(1)-O(4)  | 148.14(8) | O(7)-Zn(1)-O(1)   | 133.39(10) |
| O(6)-Nd(1)-N(1)  | 84.32(9)  | O(11)-Zn(1)-O(1)  | 111.59(10) |
| O(7)-Nd(2)-O(10) | 130.57(7) | O(11)-Zn(1)-O(7)  | 85.06(9)   |
| O(7)-Nd(2)-O(12) | 81.44(8)  | Zn(1)-O(1)-Nd(1)  | 102.42(9)  |

|                 |           |                   |           |
|-----------------|-----------|-------------------|-----------|
| O(7)-Nd(2)-N(2) | 165.46(8) | Zn(1)-O(5)-Nd(1)  | 104.08(9) |
| O(8)-Nd(2)-O(7) | 100.05(8) | Zn(1)-O(7)-Nd(2)  | 103.30(9) |
| O(8)-Nd(2)-O(9) | 146.41(8) | Zn(1)-O(11)-Nd(2) | 104.50(9) |

**Table S18** Selected bond lengths [ $\text{\AA}$ ] and bond angles [deg] for complex **11**

**Bond lengths**

|             |          |             |          |
|-------------|----------|-------------|----------|
| La(1)-O(1)  | 2.436(2) | La(2)-O(8)  | 2.270(2) |
| La(1)-O(2)  | 2.290(2) | La(2)-O(9)  | 2.418(2) |
| La(1)-O(3)  | 2.272(2) | La(2)-O(10) | 2.647(2) |
| La(1)-O(4)  | 2.658(2) | La(2)-O(12) | 2.615(2) |
| La(1)-O(5)  | 2.424(2) | La(2)-N(2)  | 2.779(3) |
| La(1)-O(11) | 2.622(2) | Zn(1)-O(1)  | 1.952(2) |
| La(1)-N(1)  | 2.768(2) | Zn(1)-O(5)  | 1.933(2) |
| La(2)-O(6)  | 2.443(2) | Zn(1)-O(6)  | 1.958(2) |
| La(2)-O(7)  | 2.270(2) | Zn(1)-O(9)  | 1.935(2) |

**Bond angles**

|                  |           |                  |           |
|------------------|-----------|------------------|-----------|
| O(1)-La(1)-O(4)  | 128.98(7) | O(7)-La(2)-O(9)  | 105.63(9) |
| O(1)-La(1)-O(11) | 82.64(8)  | O(7)-La(2)-O(10) | 84.47(8)  |
| O(1)-La(1)-N(1)  | 167.77(7) | O(7)-La(2)-O(12) | 82.45(9)  |
| O(2)-La(1)-O(1)  | 107.36(8) | O(7)-La(2)-N(2)  | 72.42(8)  |
| O(2)-La(1)-O(4)  | 89.16(7)  | O(8)-La(2)-O(6)  | 102.76(8) |
| O(2)-La(1)-O(5)  | 107.69(8) | O(8)-La(2)-O(9)  | 102.64(8) |
| O(2)-La(1)-O(11) | 80.57(8)  | O(8)-La(2)-O(10) | 89.59(8)  |
| O(2)-La(1)-N(1)  | 74.59(7)  | O(8)-La(2)-O(12) | 85.11(9)  |
| O(3)-La(1)-O(1)  | 101.30(8) | O(8)-La(2)-N(2)  | 73.69(8)  |
| O(3)-La(1)-O(2)  | 144.08(8) | O(9)-La(2)-O(6)  | 66.98(7)  |
| O(3)-La(1)-O(4)  | 89.32(7)  | O(9)-La(2)-O(10) | 63.07(7)  |
| O(3)-La(1)-O(5)  | 103.33(8) | O(9)-La(2)-O(12) | 147.63(8) |
| O(3)-La(1)-O(11) | 82.15(8)  | O(9)-La(2)-N(2)  | 126.01(8) |

---

|                  |           |                   |            |
|------------------|-----------|-------------------|------------|
| O(3)-La(1)-N(1)  | 72.95(7)  | O(10)-La(2)-N(2)  | 63.05(8)   |
| O(4)-La(1)-N(1)  | 62.55(7)  | O(12)-La(2)-O(10) | 149.16(8)  |
| O(5)-La(1)-O(1)  | 66.38(7)  | O(12)-La(2)-N(2)  | 86.36(9)   |
| O(5)-La(1)-O(4)  | 62.62(7)  | O(1)-Zn(1)-O(6)   | 131.14(10) |
| O(5)-La(1)-O(11) | 149.02(7) | O(5)-Zn(1)-O(1)   | 86.43(9)   |
| O(5)-La(1)-N(1)  | 125.07(7) | O(5)-Zn(1)-O(6)   | 111.02(10) |
| O(11)-La(1)-O(4) | 148.36(7) | O(5)-Zn(1)-O(9)   | 135.69(10) |
| O(11)-La(1)-N(1) | 85.84(8)  | O(9)-Zn(1)-O(1)   | 112.19(10) |
| O(6)-La(2)-O(10) | 130.03(7) | O(9)-Zn(1)-O(6)   | 87.11(9)   |
| O(6)-La(2)-O(12) | 80.68(8)  | Zn(1)-O(1)-La(1)  | 103.06(9)  |
| O(6)-La(2)-N(2)  | 166.84(8) | Zn(1)-O(5)-La(1)  | 104.11(9)  |
| O(7)-La(2)-O(6)  | 107.81(8) | Zn(1)-O(6)-La(2)  | 102.15(9)  |
| O(7)-La(2)-O(8)  | 144.48(8) | Zn(1)-O(9)-La(2)  | 103.70(9)  |

---

## 7. Plausible mechanism

Synergism between metal centers is proposed to explain the enhanced activity of the heterobimetallic system (**Figure S24**). The catalytic cycle starts with the coordination of epoxide with one of the rare earth metal centers, followed by attack of the co-catalyst ( $\text{NBu}_4\text{Br}$ ) to cause ring-opening process.  $\text{CO}_2$  may be activated by the zinc center, which is attacked by the alkoxide group resulting from ring-opening. In addition, Zn center contributes to stabilizing the resulting carbonate, as has been proved computationally. Finally, an intramolecular nucleophilic substitution leads to cyclization along with the release of the bromide anion.

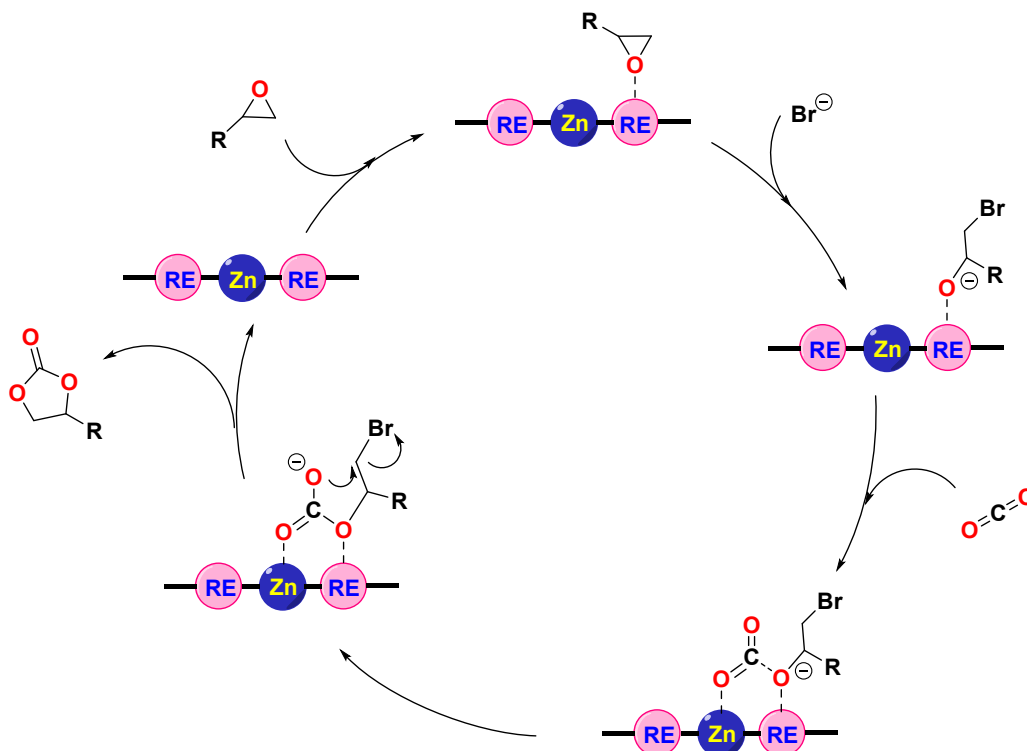

**Figure S24.** Proposed mechanism for the cycloaddition reaction
